# Supplementary material for: Physical demand at work and sick leave due to low back pain: a cross-sectional study
Source: PubMed Central journal article supplement — BMJ Open. 2019 May 22;9(5):e026917. doi: 10.1136/bmjopen-2018-026917 (PMC6537989; doi:10.1136/bmjopen-2018-026917), 2019-05-22
Supplement: bmjopen-2018-026917.draft_revisions.pdf [file bmjopen-2018-026917.draft_revisions.pdf]

# BMJ Open

BMJ Open is committed to open peer review. As part of this commitment we make the peer review history of every article we publish publicly available.

When an article is published we post the peer reviewers' comments and the authors' responses online. We also post the versions of the paper that were used during peer review. These are the versions that the peer review comments apply to.

The versions of the paper that follow are the versions that were submitted during the peer review process. They are not the versions of record or the final published versions. They should not be cited or distributed as the published version of this manuscript.

BMJ Open is an open access journal and the full, final, typeset and author-corrected version of record of the manuscript is available on our site with no access controls, subscription charges or pay-per-view fees (<http://bmjopen.bmj.com>).

If you have any questions on BMJ Open's open peer review process please email [info.bmjopen@bmj.com](mailto:info.bmjopen@bmj.com)

# BMJ Open

## Sick leave due to low back pain. The association with self-reported physical demand, fear avoidance and exposure to physical demanding workloads. A Cross-Sectional Study.

|                               |                                                                                                                                                                                                                                                                                                                                                                                                                                                                                                                                                                                                                                                                                                                                                                                                                                                                                                                                                                                                                                                                                                                                                                                                                                                                                        |
|-------------------------------|----------------------------------------------------------------------------------------------------------------------------------------------------------------------------------------------------------------------------------------------------------------------------------------------------------------------------------------------------------------------------------------------------------------------------------------------------------------------------------------------------------------------------------------------------------------------------------------------------------------------------------------------------------------------------------------------------------------------------------------------------------------------------------------------------------------------------------------------------------------------------------------------------------------------------------------------------------------------------------------------------------------------------------------------------------------------------------------------------------------------------------------------------------------------------------------------------------------------------------------------------------------------------------------|
| Journal:                      | <i>BMJ Open</i>                                                                                                                                                                                                                                                                                                                                                                                                                                                                                                                                                                                                                                                                                                                                                                                                                                                                                                                                                                                                                                                                                                                                                                                                                                                                        |
| Manuscript ID                 | bmjopen-2018-026917                                                                                                                                                                                                                                                                                                                                                                                                                                                                                                                                                                                                                                                                                                                                                                                                                                                                                                                                                                                                                                                                                                                                                                                                                                                                    |
| Article Type:                 | Research                                                                                                                                                                                                                                                                                                                                                                                                                                                                                                                                                                                                                                                                                                                                                                                                                                                                                                                                                                                                                                                                                                                                                                                                                                                                               |
| Date Submitted by the Author: | 27-Sep-2018                                                                                                                                                                                                                                                                                                                                                                                                                                                                                                                                                                                                                                                                                                                                                                                                                                                                                                                                                                                                                                                                                                                                                                                                                                                                            |
| Complete List of Authors:     | <p>Aavang Petersen, Jonathan; Copenhagen University Hospital Bispebjerg and Frederiksberg, Department of Occupational and Environmental Medicine</p> <p>Kirkeskov, Lilli; Copenhagen University Hospital Bispebjerg and Frederiksberg, Department of Occupational and Environmental Medicine, Unit of Social Medicine</p> <p>Hansen, Bjarke; Copenhagen University Hospital, Bispebjerg and Frederiksberg Hospital, The Parker Institute, Department of Rheumatology</p> <p>Begtrup, Luise; Copenhagen University Hospital Bispebjerg and Frederiksberg, Department of Occupational and Environmental Medicine</p> <p>Flachs, Esben; Copenhagen University Hospital Bispebjerg and Frederiksberg, Department of Occupational and Environmental Medicine</p> <p>Boesen, Mikael; Copenhagen University Hospital, Bispebjerg and Frederiksberg Hospital, Department of Radiology</p> <p>Hansen, Philip; Copenhagen University Hospital, Bispebjerg and Frederiksberg, Department of Radiology</p> <p>Bliddal, Henning; Copenhagen University Hospital, Bispebjerg and Frederiksberg Hospital, The Parker Institute, Department of Rheumatology</p> <p>Kryger, Ann; Copenhagen University Hospital Bispebjerg and Frederiksberg, Department of Occupational and Environmental Medicine</p> |
| Keywords:                     | OCCUPATIONAL & INDUSTRIAL MEDICINE, PREVENTIVE MEDICINE, REHABILITATION MEDICINE, RHEUMATOLOGY                                                                                                                                                                                                                                                                                                                                                                                                                                                                                                                                                                                                                                                                                                                                                                                                                                                                                                                                                                                                                                                                                                                                                                                         |
|                               |                                                                                                                                                                                                                                                                                                                                                                                                                                                                                                                                                                                                                                                                                                                                                                                                                                                                                                                                                                                                                                                                                                                                                                                                                                                                                        |

SCHOLARONE™  
Manuscripts

1  
2  
3  
4  
5  
6  
7  
8  
9  
10  
11  
12  
13  
14  
15  
16  
17  
18  
19  
20  
21  
22  
23  
24  
25  
26  
27  
28  
29  
30  
31  
32  
33  
34  
35  
36  
37  
38  
39  
40  
41  
42  
43  
44  
45  
46  
47  
48  
49  
50  
51  
52  
53  
54  
55  
56  
57  
58  
59  
60

1 Sick leave due to low back pain. The association with self-reported physical demand,  
2 fear avoidance and exposure to physical demanding workloads. A Cross-Sectional  
3 Study.

4 Jonathan Aavang Petersen, MD<sup>†</sup>, Lilli Kirkeskov, PhD<sup>†</sup>, Bjarke Brandt Hansen, PhD<sup>\*</sup>, Luise  
5 Mølenberg Begtrup, PhD<sup>†</sup>, Esben Meulengracht Flachs, PhD<sup>†</sup>, Michael Boesen, PhD<sup>#</sup>, Phillip  
6 Hansen, PhD<sup>#</sup>, Henning Bliddal, DMSc<sup>\*</sup> and Ann Isabel Kryger, PhD<sup>†</sup>

7 <sup>†</sup> Department of Occupational and Environmental Medicine, Copenhagen University Hospital,  
8 Bispebjerg and Frederiksberg, Denmark. <sup>\*</sup>The Parker Institute, Department of Rheumatology,  
9 Copenhagen University Hospital, Bispebjerg and Frederiksberg Hospital, Copenhagen, Denmark.

10 <sup>#</sup>Department of Radiology, Copenhagen University Hospital, Bispebjerg and Frederiksberg  
11 Hospital

12 **Corresponding author details and contacts:**

13 Jonathan Aavang Petersen, MD

14 Department of Occupational and Environmental Medicine, Copenhagen University Hospital  
15 Bispebjerg and Frederiksberg, Bispebjerg Bakke 23, DK-2400 Copenhagen NV

16 E-mail: jonathanaavang@hotmail.com

17 Word count: 2819

18

19

20

21

Sick leave due to low back pain.

1  
2  
3  
4 **1 Abstract**

5  
6 **2 Objectives:** To investigate if self-reported high physical demand at work, objective physical  
7  
8  
9  
10  
11  
12  
13  
14  
15  
16  
17  
18  
19  
20  
21  
22  
23  
24  
25  
26  
27  
28  
29  
30  
31  
32  
33  
34  
35  
36  
37  
38  
39  
40  
41  
42  
43  
44  
45  
46  
47  
48  
49  
50  
51  
52  
53  
54  
55  
56  
57  
58  
59  
60  
**3** workload using a job exposure matrix (JEM) and fear avoidance beliefs are risk factors for sick  
**4** leave in persons with low back pain (LBP). Secondly, to investigate if the effects of fear avoidance  
**5** and self-reported high physical demand at work on sick leave are modified by the objective physical  
**6** workloads.

**7 Settings:** Participants were recruited from general practice and by advertisement in a local  
**8** newspaper.

**9 Participants:** 305 participants with LBP, a current period of 2 to 4 weeks and self-reported  
**10** difficulty in maintaining physically demanding jobs due to LBP were interviewed, clinically  
**11** examined and had an MRI at baseline.

**12 Main outcome measures:** Independent variables were high fear avoidance, self-reported high  
**13** physical demand at work and objective measures of physical workloads (JEM). Outcome was self-  
**14** reported sick leave due to LBP in the previous year. Logistic regression and tests for interaction  
**15** were used to identify risk factors and modifiers for the association with self-reported sick leave.

**16 Results:** Self-reported physically demanding work and high fear avoidance were significantly  
**17** associated with increased risk of prior sick leave due to LBP with OR 1.75 95%CI(1.10-2.75) and  
**18** 2.75 95%CI(1.61-4.84) respectively. No objective physical workloads had significant associations.  
**19** There was no modifying effect of objective physical workloads on the association between self-  
**20** reported physical demand at work/ high fear avoidance and sick leave.

**21 Conclusions:** Occupational interventions to reduce sick leave due to LBP should focus more on  
**22** those who rate their work as physically demanding and have high fear avoidance beliefs about  
**23** work, and less on identification of individuals with the objectively highest physical workload.

**24 Trial registration:** The GoBack trial was registered with ClinicalTrials.gov (identifier:  
**25** NCT02015572) on 29 November 2013

1  
2  
3  
4 1  
5  
6 2  
7  
8  
9 3  
10  
11 4  
12  
13 5  
14  
15 6  
16  
17 7  
18  
19 8  
20  
21 9  
22  
23 10  
24  
25 11  
26  
27 12  
28  
29 13  
30  
31 14  
32  
33 15  
34  
35 16  
36  
37 17  
38  
39 18  
40  
41 19  
42  
43 20  
44  
45  
46  
47  
48  
49  
50  
51  
52  
53  
54  
55  
56  
57  
58  
59  
60

## Strength and limitations of this study.

- A strength of this study is the combination of fear avoidance score and self-reported and objective workload exposures in relation to sick leave to overcome the validity problem with self-reported exposures
- Data were obtained from a clinically relevant sample of participants with low back pain.
- Only participants with self-reported physically demanding or very demanding work were included in the study with risk of lacking contrast among the participants and thus between the groups.
- Use of JEMs and dichotomizing of the exposure data without a golden standard regarding cut-off values entails risk of misclassification of exposure.

Sick leave due to low back pain.

1  
2  
3  
4 1  
5  
6

7 2  
8  
9

10 3 **INTRODUCTION**  
11

12 4 **Background**  
13

14  
15 5 Low back pain (LBP) is a common musculoskeletal disorder and is one of the leading causes of  
16 6 disability for the working population. [1,2] In the US low back and neck pain accounted for the  
17 7 third-highest amount with estimated health care spending of \$87.6 billion.[3]  
18  
19

20  
21  
22 8 The risk factors for developing LBP are believed to be a complex combination of both mechanical  
23 9 and physiological factors, and psychological, social and cultural factors.[4] Systematic reviews have  
24 10 concluded that no single intervention is likely to be effective to prevent LBP, due to its  
25 11 multidimensional nature.[5–7]  
26  
27

28  
29  
30 12 Psychological factors such as high fear avoidance beliefs (FAB) has proven to be an important  
31 13 prognostic factor for poor outcome in patients with nonspecific LBP[8] and as such have a  
32 14 predictive effect on sick leave. [9,10] FAB is believed to influence the perception of pain resulting  
33 15 in catastrophizing, fear and avoidance of physical activities. This leads to a vicious cycle of fear  
34 16 avoidance behaviour, physical deterioration and social isolation – factors which may affect the  
35 17 ability to stay in job.[10]  
36  
37

38  
39  
40 18 Self-reported workload exposures have been investigated as risk factors for LBP in the majority of  
41 19 studies [11–13] despite the fact, that self-reported workload exposures may entail a validity problem  
42 20 as individuals with musculoskeletal complaints tend to overestimate their exposures.[14], A job  
43 21 exposure matrix (JEM) is a classification system linking occupation and industry titles with job-  
44 22 related exposures.[15] This could be more accurate estimating the real exposure of physical  
45  
46  
47  
48  
49  
50  
51  
52  
53  
54  
55  
56  
57  
58  
59  
60

1  
2  
3  
4 1 demands because of reduction misclassification of exposure. However, we do not know if a JEM is  
5  
6 2 better at predicting risk of sick leave. JEMs have been shown to be an independent and valid  
7  
8 3 measurement of physical demands in patients with primary hip and knee osteoarthritis [16], may be  
9  
10 4 useful in the assessment of exposure for LBP patients, and be a predictor for sick leave.  
11  
12

### 13 **Objective**

14  
15  
16 6 The objective of the study was 1) to investigate to what degree self-reported high physical demand  
17  
18 7 at work, physical workload using the job exposure matrix and fear avoidance beliefs are risk factors  
19  
20 8 for sick leave in a group of persons with low back pain and 2) if the effect of fear avoidance and  
21  
22 9 self-reported high physical demand at work on sick leave is modified by the objective measures of  
23  
24  
25 10 physical workloads.  
26  
27

### 28 **METHODS**

#### 29 **Design and Ethics**

30  
31  
32 13 The study was based on cross-sectional baseline data from a randomized controlled trial (the  
33  
34 14 GoBack trial, NCT02015572) [17] and reported in accordance with the Strengthening the Reporting  
35  
36 15 of Observational Studies in Epidemiology guidelines – the STROBE.[18] All participants gave  
37  
38 16 written informed consent before enrolment and the study was approved by the local ethics  
39  
40 17 committee (H-3-2013-161) and the Danish Data Protection Agency ((DPA approval number 2014-  
41  
42 18 41-2673).  
43  
44  
45  
46 19

#### 47 **Participants and setting**

48  
49 21 Participants between 18 and 65 years of age with a current episode of 2 to 4 weeks of LBP and a  
50  
51 22 self-reported physically demanding job were recruited from general practice, the outpatient clinic of  
52  
53 23 the Department of Rheumatology, Frederiksberg Hospital, Denmark and by advertisement in a local  
54  
55  
56  
57  
58  
59  
60

Sick leave due to low back pain.

1 newspaper. Potential participants were interviewed by telephone and screened for inclusion.  
2 Participants responded to “How physically demanding is your current job?” and only those  
3 responding demanding or very demanding were included. Furthermore, the participants needed to  
4 express concerns about the ability to maintain their current job and they had to have current  
5 employment for at least 30 hours/week. Individuals with pregnancy, other severe somatic or  
6 psychiatric disease, cancer or metastatic disease, severe co-morbidity, treatment or referral to  
7 outside providers (for example surgery) or contraindications for having a conventional MRI were  
8 not included.

## 9 **Variables**

10 At the first visit (baseline) participants filled in a battery of questionnaires on a validated touch  
11 screen[19], underwent a physical examination and an MRI. The questionnaires investigated  
12 demographic information, comorbidity, job-category, previous history of LBP, physically  
13 demanding work, leisure-time, physical activity, psychosocial work environment, general health  
14 status, history of work-related factors, work ability, back-specific disability, fear avoidance beliefs,  
15 pain score and sick leave due to LBP. Diagnosis was based on symptoms, clinical examination and  
16 MRI.

17 Sick leave due to LBP was recorded by answering the following questions at baseline: “how many  
18 days of sick leave have you had due to LBP in the previous year?” Categorized as short (1-7 days),  
19 medium (8-30 days), long (31-90 days), very long (over 90 days) or every day. Sick leave due to  
20 LBP was then dichotomized as low (1-7 days/year) and high ( $\geq 8$ days/year) due to overall low sick  
21 leave among the participants.

22 Fear avoidance beliefs was assessed with the 16-item Fear-Avoidance Beliefs Questionnaire  
23 (FABQ).[20] FABQ-W is the sum of seven items (score range 0-42 points) with each item scored



1  
2  
3  
4 1 on a seven-point Likert scale from strongly disagree (0-points) to strongly agree (6-points). We  
5  
6 2 defined high fear avoidance beliefs as FABQ-W>20 points.[21]  
7  
8  
9 3 Physically demanding work was evaluated both by self-report (having a very demanding or having  
10  
11 4 a demanding current job) and with the use of the Lower Body Job Exposure Matrix (JEM).[16]  
12  
13  
14 5 Job titles from the baseline questionnaires were transformed into an occupational title in the Danish  
15  
16 6 version of the International Standard Classification of Occupations (D-ISCO-88).[22] The JEM  
17  
18 7 consisted of 168 D-ISCO codes which were divided into 121 job groups. Occupational medicine  
19  
20 8 experts assessed physical exposures during a working day and estimated time sitting, time  
21  
22 9 standing/walking, time with whole body vibration, time kneeling, and lifting (cumulated weight and  
23  
24 10 number of heavy lifts>20 kg) in different jobs. The JEM did not include all job titles. Therefore, we  
25  
26 11 matched missing job titles to a similar existing job title and exposure in the JEM. This was done by  
27  
28 12 consensus preceded by independent matching by two occupational medicine experts. We  
29  
30 13 dichotomized JEM variables according to median values to maximize strength of data, and tested  
31  
32 14 other exposure levels (standing/walking > 6 hours/day, lifting a total of >1000 kg/day and lifting  
33  
34 15 over 20kgs > 15 times/day).

## 38 16 **Statistical methods**

40  
41 17 Descriptive data are reported as point estimates (either frequency or mean and standard deviation  
42  
43 18 [SD]); the correlation between self-reported physical demand at work and FABQ-W>20 was  
44  
45 19 calculated as Spearman's rank correlation. We used a series of multivariate logistic regression  
46  
47 20 models to investigate each measure from the Lower Body JEM separately. The models investigated  
48  
49 21 the association between dichotomized sick leave due to LBP  $\geq$  8 days compared to 1-7 days during  
50  
51 22 the previous year (outcome) and either self-reported physical demand at work, fear avoidance, or  
52  
53 23 objective workload (JEM), all adjusted for age and sex. Analyses of the modifying effects of  
54  
55  
56  
57  
58  
59  
60

Sick leave due to low back pain.

1  
2  
3  
4 1 specific independent variables on effect of self-reported exposure were performed by adding an  
5  
6 2 interaction term between the objective (JEM) and self-reported exposure (e.g. FABQ-W and self-  
7  
8 3 reported physically demanding work) to the regression model. Statistical analyses for descriptive  
9  
10 4 data were done using SAS version 9.2 (SAS Institute IC, Cary, NC, USA) and regression analysis  
11  
12 5 were done using R® v 3.2.2 (R: A Language and Environment for Statistical Computing, R  
13  
14 6 Foundation for Statistical Computing, Vienna, Austria, 2016, <https://www.R-project.org>). All  
15  
16 7 analyses used a significance level of 0.05.  
17  
18

## 19 8 **Patient and public involvement**

20  
21  
22 9 Patients or the general public were not involved in the design or development of the study.  
23  
24

## 25 10 **RESULTS**

### 26 11 **Participants**

27  
28  
29 12 Based on the telephone interview 274 participants out of 573 interviewed were excluded, mainly  
30  
31 13 due to not having a current episode of LBP or not having a physically demanding job. Of the 326  
32  
33 14 enrolled participants 305 participants came to the first visit and were included in the study, see  
34  
35 15 Figure 1. A total of 55 job titles (48 among male and 24 among women) were represented and 41  
36  
37 16 participants were reassigned a new job title with similar exposure group due to lacking presence in  
38  
39 17 the JEM (data not shown).  
40  
41  
42

### 43 18 **Descriptive data**

44  
45  
46 19 Participant characteristics are shown in table 1.  
47  
48  
49  
50  
51  
52  
53  
54  
55 22  
56  
57  
58  
59  
60

1  
2  
3  
4  
5  
6  
7  
8  
9  
10  
11  
12  
13  
14  
15  
16  
17  
18  
19  
20  
21  
22  
23  
24  
25  
26  
27  
28  
29  
30  
31  
32  
33  
34  
35  
36  
37  
38  
39  
40  
41  
42  
43  
44  
45  
46  
47  
48  
49  
50  
51  
52  
53  
54  
55  
56  
57  
58  
59  
60

Table 1 Characteristics of the participants (N=305)

|                                                    | Self-reported physical demand |                |      |           |      |          | P-value            |
|----------------------------------------------------|-------------------------------|----------------|------|-----------|------|----------|--------------------|
|                                                    | Total                         | Very demanding |      | Demanding |      |          |                    |
|                                                    | 305                           | (100%)         | 144  | (47.2%)   | 161  | (52.8%)  |                    |
| <b>Age, years, Mean ±SD</b>                        | 45.5                          | ± 10.3         | 47.5 | ±9.8      | 43.3 | ±10.3    | <0.001*            |
| <b>Males, n (%)</b>                                | 206                           | (67.5%)        | 96   | (66.7%)   | 110  | (68.3%)  | 0.853 <sup>†</sup> |
| <b>Current Smoking</b>                             |                               |                |      |           |      |          | 0.004 <sup>†</sup> |
| Yes, n (%)                                         | 112                           | (36.7%)        | 63   | (43.8%)   | 49   | (30.43%) |                    |
| No, n (%)                                          | 193                           | (63.3%)        | 81   | (56.3%)   | 112  | (69.6%)  |                    |
| <b>BMI (kg/m<sup>2</sup>)</b>                      | 26.9                          | ± 4.2          | 27.2 | ±4.1      | 26.7 | ±4.4     | 0.278*             |
| <b>Actual sick leave due to LBP, n (%)</b>         | 34                            | (11.2%)        | 23   | (16.0%)   | 11   | (6.8%)   | 0.020 <sup>†</sup> |
| <b>Sick leave due to LBP last year</b>             |                               |                |      |           |      |          | 0.069 <sup>†</sup> |
| 1-7 days, n (%)                                    | 168                           | (55.1%)        | 69   | (47.9%)   | 99   | (61.5%)  |                    |
| 8-30 days, n (%)                                   | 104                           | (34.1%)        | 104  | (38.9%)   | 56   | (29.8%)  |                    |
| 31-90 days, n (%)                                  | 25                            | (8.2%)         | 13   | (9.0%)    | 12   | (7.5%)   |                    |
| >90 days, n (%)                                    | 8                             | (2.6%)         | 2    | (4.2%)    | 6    | (1.2%)   |                    |
| <b>Physical demanding workloads</b>                |                               |                |      |           |      |          |                    |
| Standing/walking > 5.44 hours/day, n (%)           | 147                           | (48.2%)        | 69   | (47.9%)   | 78   | (48.5%)  | 0.328 <sup>†</sup> |
| Lifting >650 kg/day, n (%)                         | 148                           | (48.5%)        | 77   | (53.5%)   | 71   | (44.1%)  | 0.128 <sup>†</sup> |
| Number of heavy lifts > 7.7 times/day, n (%)       | 145                           | (47.5%)        | 75   | (52.1%)   | 70   | (43.5%)  | 0.165 <sup>†</sup> |
| <b>Clinical symptoms</b>                           |                               |                |      |           |      |          | 0.468 <sup>†</sup> |
| LBP, n (%)                                         | 170                           | (55.7%)        | 85   | (59.0%)   | 85   | (52.8%)  |                    |
| LBP and + additional sciatica, n (%)               | 86                            | (28.2%)        | 36   | (25.0%)   | 50   | (31.1%)  |                    |
| LBP and + additional radiating pain, n (%)         | 49                            | (16.1%)        | 23   | (16.0%)   | 26   | (16.2%)  |                    |
| <b>Primary diagnosis<sup>‡</sup></b>               |                               |                |      |           |      |          | 0.498 <sup>†</sup> |
| Spondylosis, n (%)                                 | 155                           | (50.8%)        | 68   | (47.2%)   | 87   | (54.0%)  |                    |
| Herniated disc, n (%)                              | 48                            | (15.7%)        | 23   | (16.0%)   | 25   | (15.5%)  |                    |
| Spondylolisthesis, n (%)                           | 23                            | (7.5%)         | 11   | (7.6%)    | 12   | (7.5%)   |                    |
| Spinal stenosis, n (%)                             | 12                            | (3.9%)         | 4    | (2.8%)    | 8    | (5.0%)   |                    |
| Unspecific LBP, n (%)                              | 46                            | (15.1%)        | 24   | (16.7%)   | 22   | (13.7%)  |                    |
| Spondyloarthritis, n (%)                           | 13                            | (4.3%)         | 9    | (6.3%)    | 4    | (2.5%)   |                    |
| Other, n (%)                                       | 8                             | (2.6%)         | 5    | (3.5%)    | 3    | (1.9%)   |                    |
| <b>Current job<sup>#</sup></b>                     |                               |                |      |           |      |          | 0.816 <sup>†</sup> |
| Disco 1, 2: professionals and high educated, n (%) | 21                            | (6.9%)         | 9    | (6.3%)    | 12   | (7.5%)   |                    |
| Disco 3, 4, 5: office, teaching and nursing, n (%) | 99                            | (33.8%)        | 47   | (32.6%)   | 56   | (34.8%)  |                    |
| Disco 6, 7, 8, 9: blue collar, n (%)               | 181                           | (59.3%)        | 88   | (61.1%)   | 93   | (57.7%)  |                    |
| <b>Pain intensity (VAS 0-10)</b>                   |                               |                |      |           |      |          |                    |
| Average last 4 weeks, Mean ±SD                     | 5.6                           | ± 1.9          | 5.3  | ±1.9      | 5.99 | ±1.9     | 0.002*             |
| Actual, Mean ±SD                                   | 4.5                           | ± 2.1          | 4.3  | ±2.1      | 4.7  | ±2.0     | 0.105*             |

Sick leave due to low back pain.

|                                               |      |           |      |            |      |           |         |
|-----------------------------------------------|------|-----------|------|------------|------|-----------|---------|
| Highest intensity last 4 weeks, Mean $\pm$ SD | 7.1  | $\pm$ 2.0 | 6.75 | $\pm$ 2.0  | 7.5  | $\pm$ 2.0 | <0.001* |
| <b>Fear Avoidance Beliefs</b>                 |      |           |      |            |      |           | <0.001* |
| Low (0-20), n (%)                             | 83   | (27.2%)   | 23   | (16.0%)    | 60   | (37.3%)   |         |
| High (21-42), n (%)                           | 222  | (72.8%)   | 121  | (84.0%)    | 101  | (62.7%)   |         |
| (0-42), Mean $\pm$ SD                         | 25.0 | $\pm$ 7.4 | 22.6 | $\pm$ 7.03 | 27.8 | $\pm$ 6.9 | <0.001* |

†Based on symptoms, clinical examination and MRI. \*t-test, + $\chi^2$ -test, # Danish version of the International Standard Classification of Occupations

Values are percentages of participants or mean and SDs.

BMI; body mass index, VAS; visual analog scale, FABQ; Fear Avoidance Beliefs Questionnaire. LBP; low back pain

1

2 Of the included participants 47.2% indicated having a very physically demanding job and 52.8% a  
3 physically demanding job. Blue collar workers amounted to 59.3% of the participants, 33.8% were  
4 in teaching, office work or nursing and 6.9% were professionals and higher educated.

5 Overall there was a low rate of sick leave due to LBP with 89.2% participants having less than one  
6 month of sick leave during the last 12 months.

7 Participants with a self-reported very physically demanding job were slightly, but significantly  
8 older compared to participants who only reported their job demanding. There were no significant  
9 differences regarding sex, BMI, JEM or educational level.

## 10 Risk factors for sick leave due to LBP

11 High self-reported physical demand and high fear avoidance beliefs (FABQ-W>20) were both  
12 significantly associated with sick leave due to LBP  $\geq$  8 days per year with OR 1.75 (95% CI 1.10-  
13 2.75) and 2.75 (95% CI 1.61-4.84), respectively. After adjustment for age and sex, there was still a  
14 strong association, see table 2.

Table 2: Crude and adjusted odds risk ratio for sick leave due to LBP according to self-rated physical demand, fear avoidance behavior and physical demanding workloads, respectively.

|                                   | Unadjusted OR<br>(95%CI) | P-value | Adjusted* OR<br>(95%CI) | P-value |
|-----------------------------------|--------------------------|---------|-------------------------|---------|
| <b>Self-rated physical demand</b> |                          |         |                         |         |
| Demanding                         | 1                        |         | -                       | -       |
| Very demanding                    | 1.75 (1.10-2.75)         | 0.018   | 1.60(1.00-2.56)         | 0.050   |
| <b>Fear avoidance beliefs</b>     |                          |         |                         |         |

Sick leave due to low back pain.

|                                       |                  |        |                  |       |
|---------------------------------------|------------------|--------|------------------|-------|
| FABQ-W $\leq$ 20 <sup>+</sup>         | 1                | -      | -                | -     |
| FABQ-W $>$ 20 <sup>+</sup>            | 2.75 (1.61-4.84) | <0.001 | 2.67 (1.55-4.73) | 0.001 |
| <b>Physical demanding workloads</b>   |                  |        |                  |       |
| Standing/walking > 5.44 hours/day     | 0.85 (0.5-1.34)  | 0.485  | 0.84 (0.53-1.33) | 0.462 |
| Lifting >650 kg/day                   | 1.41 (0.90-2.23) | 0.134  | 1.38 (0.87-2.18) | 0.174 |
| Number of heavy lifts > 7.7 times/day | 1.60 (1.02-2.53) | 0.041  | 1.57 (0.99-2.50) | 0.056 |

\* Adjusted for sex and age, + Fear-Avoidance Beliefs Questionnaire-in relation to Work

1

2 There was a positive association of lifting loads over 20 kg more than 7.7 times per day measured  
 3 by JEM, which was borderline statistically significant after adjustment. None of the other physical  
 4 workloads were significantly associated with sick leave due to LBP. There was very low exposure  
 5 to kneeling and whole-body vibration and thus these exposures were not included in the analyses.

### 6 Interactions

7 No significant modifying effect of physical demanding workloads (standing/walking >5.44  
 8 hours/day, total kg lifted > 650 kg/day and lifting loads over 20kg more than 7.7 times per day) on  
 9 the association between self-reported physical demand and sick leave due to LBP was found (table  
 10 3).

Table 3: Modifying effects of specific independent exposures on the effect of self-reported physical demand on sick leave due to LBP.

|                                       | Interaction OR* (95%CI) | P-value |
|---------------------------------------|-------------------------|---------|
| <b>Fear avoidance beliefs</b>         |                         |         |
| FABQ-W $>$ 20 <sup>+</sup>            | 1.27 (0.39-4.32)        | 0.70    |
| <b>Physical demanding workloads</b>   |                         |         |
| Standing/walking > 5.44 hours/day     | 0.74 (0.29-1.86)        | 0.52    |
| Standing/walking > 6 hours/day        | 1.21 (0.37-4.02)        | 0.76    |
| Lifting >650 kg/day                   | 0.63 (0.24-1.59)        | 0.32    |
| Lifting >1000 kg/day                  | 0.99 (0.37-2.64)        | 0.97    |
| Number of heavy lifts > 7.7 times/day | 0.75 (0.29-1.90)        | 0.4     |
| Number of heavy lifts > 15 times/day  | 1.09 (0.28-4.39)        | 0.90    |

\* Adjusted for sex and age, + Fear-Avoidance Beliefs Questionnaire-in relation to Work

11 We repeated the analysis with other exposure levels (standing/walking > 6 hours/day, lifting a total  
 12 of >1000 kg/day and lifting over 20kgs > 15 times/day) but this did not change the results.

Sick leave due to low back pain.

1 Similar results of no modification effect of JEM variables were found between FABQ-W>20 and  
2 sick leave due to LBP, table 4.

3

4

5

Table 4: Modifying effects of specific independent exposures on the effect of fear avoidance beliefs on sick leave due to LBP.

|                                       | Interaction OR* (95%CI) | P-value |
|---------------------------------------|-------------------------|---------|
| <b>Physical demanding workloads</b>   |                         |         |
| Standing/walking > 5.44 hours/day     | 0.77 (0.25-2.40)        | 0.65    |
| Standing/walking > 6 hours/day        | 1.16 (0.30-5.29)        | 0.83    |
| Lifting >650 kg/day                   | 0.88 (0.29-2.69)        | 0.83    |
| Lifting >1000 kg/day                  | 1.11 (0.34-3.82)        | 0.87    |
| Number of heavy lifts > 7.7 times/day | 1.04 (0.34-3.16)        | 0.95    |
| Number of heavy lifts > 15 times/day  | 1.38 (0.30-6.70)        | 0.68    |

\* Adjusted for sex and age,

6

7 There was a relatively poor correlation between self-reported physical demand and high fear  
8 avoidance (FABQ-W>20) ( $r= 0.29$ ,  $P<0.0001$ ). No correlation was found between self-reported  
9 physical demand and total kg lifted ( $r= -0.05$ ,  $P=0.345$ ), standing/walking time ( $r= 0.07$ ,  $P=0.254$ )  
10 or lifting loads over 20kg ( $r= -0.05$ ,  $P=0.349$ ).

## 11 **DISCUSSION**

### 12 **Key results**

13 In this study, self-reported high physical demand at work and high fear avoidance were associated  
14 with sick leave due to LBP. Standing/walking time and total number of kg lifted in one day had no  
15 effect on sick leave due to LBP, whereas lifting over 20 kg several times a day (7.7 times per day)  
16 may have an importance. To some surprise, there was no modifying effect of adding these

1 independent expert exposure assessments on workload on the found association between self-  
2 reported high physical demand at work/ high fear avoidance and sick leave.

3 Our results confirmed the hypothesis that main risk factors for sick leave due to LBP were self-  
4 reported very physically demanding work and high fear avoidance and to a lesser degree  
5 “objective” intensity of specific types of physical workloads. The poor correlation between JEM  
6 variables and self-reported physical demand supports this conclusion.

### 7 **Limitations**

8 Some limitations of the study need to be considered. The study is based on cross-sectional baseline  
9 data from a randomized controlled trial with the aim of retaining participants with physically  
10 demanding work and LBP in their job. As a result, the trial included only participants with self-  
11 reported physically demanding or very demanding work and expressed concern about their ability  
12 to maintain their current job. The resulting fear avoidance score and self-reported physical demands  
13 may consequently have been inflated probably resulting in a lacking contrast among the participants  
14 and therefore between the groups. An association was found and the estimate is probably therefore  
15 conservative. Use of JEMs entails risk of misclassification of exposure.[23] People with the same  
16 job title may have very different exposure to physical workloads and using expert assessment of  
17 exposures at the occupational level may therefore miss potentially large individual differences and  
18 peak exposures. Another limitation is the dichotomizing of the JEM based physical workload  
19 exposures and of the FABQ-W. No gold standard exists regarding cut-off values for either. Several  
20 different methods have been proposed and used, and none have been validated.[8] We used FABQ-  
21 W score at 20 or less for low fear avoidance as proposed by others[8,21] and medians for JEM  
22 based physical workload exposures. This may also increase the risk of misclassification and  
23 therefore underestimate differences between groups. Self-reported sick leave is sensitive to recall

Sick leave due to low back pain.

1 bias. However, a meta-analysis has found reasonable rank order convergence with record-based  
2 data[24], for which reason we trust in the outcome data. This study includes a selected group of  
3 participants with physically demanding work. We did not adjust for socioeconomic status due to  
4 risk for over-adjusting since workers with lower socioeconomic status tend to have more physically  
5 demanding work.[25] Sample size might explain the wide confidence intervals on all modifications  
6 by JEM, but since all odds-ratios are close to 1, it is hardly a question of lack of strength in the data.  
7 Neither was there a problem with data contrast in exposure variables of the JEM.  
8 Self-reported workload exposures are often used as exposure variable, although it may have a  
9 validity problem, as individuals with musculoskeletal complaints tend to overestimate their  
10 exposures.[14] In this study, we have overcome this problem by using a job exposure matrix in  
11 combination with perceived self-reported physical demand.

## 12 **Interpretation**

13 To some surprise the participants reporting work as very physically demanding also had the lowest  
14 mean fear avoidance, lowest current and average pain intensity and were more seldom smokers than  
15 participants reporting work as physically demanding. The low correlation between self-reported  
16 physical demand and JEM variables and no modifying effect of JEM variables indicates that self-  
17 reported physical demand might be a more independent risk factor than expected. This may be an  
18 expression of the participants assessment of their own physical work capacity with LBP or another  
19 work-related factor that we have not investigated. Due to the exclusion of participants with low self-  
20 reported physical demand we were unable to explore this further.

21 The Lower Body JEM have recently been used on a large general working population and found a  
22 exposure-response relation between ton- lifting- and kneeling years and all-cause long term sick  
23 leave.[26] The contrast with our results may be due to different definitions of exposure (medians vs



1  
2  
3  
4  
5  
6  
7  
8  
9  
10  
11  
12  
13  
14  
15  
16  
17  
18  
19  
20  
21  
22  
23  
24  
25  
26  
27  
28  
29  
30  
31  
32  
33  
34  
35  
36  
37  
38  
39  
40  
41  
42  
43  
44  
45  
46  
47  
48  
49  
50  
51  
52  
53  
54  
55  
56  
57  
58  
59  
60

1 ton-/lifting-years), older but healthier population and long term versus relatively short-term sick  
2 leave.

3 Participants with different duration of LBP have different prognostic outcome. Thus it is shown that  
4 acute and chronic LBP and high FAB are less associated with poor outcome than subacute LBP,  
5 were there has been found a positive association between sick leave and high fear avoidance.[8,27]  
6 Our results are in line with these results although many of our participants in addition to a subacute  
7 period of LBP also had a longer history of LBP.

8 Self-reported physical workloads and sick leave have been found to be associated.[11–13] Recently,  
9 5076 employed wage earners in Denmark have been investigated and self-assessed life-long hard  
10 physical work and in particular lifting/carrying tasks was found to be associated with all-cause long-  
11 term sick leave.[28] Similar results was found in shipyard workers, where borderline significant  
12 association between sick leave due to LBP and self-reported physical work factors was found.[29]  
13 Our results are in line with these findings, although we used other exposure definitions. In contrast,  
14 a longitudinal study with 6 months follow-up among 407 industrial workers used high perceived  
15 physical workload as exposure variable, but found no association with sick leave due to LPB.[30]  
16 This result can however be explained by low number of workers reporting sick leave or having  
17 LBP.

18 In a large review regarding acute LBP and sick leave Steenstra et al found strong evidence for  
19 heavy work, in various definitions, as a predictor for duration of sick leave.[31] A later review by  
20 the same author regarding patients with subacute and chronic LBP, a population more similar to  
21 ours, concluded insufficient to moderate evidence for an association with physical demands at  
22 work.[25]

Sick leave due to low back pain.

1  
2  
3  
4 1 In a longitudinal study with video-documented physical exposures lifting, trunk flexion and rotation  
5  
6 2 increased the risk of sick leave due to LBP.[32] In our study, we did not use objective  
7  
8 3 measurements but instead a JEM, which may explain the difference between the results because of  
9  
10 4 the risk of misclassification of exposure by using JEM. This illustrates the importance of further  
11  
12 5 large studies with objective measures of physical workload and prospective designs.  
13  
14

## 15 6 **CONCLUSION**

17  
18 7 Our data suggest that self-reported high physical demand at work and high fear avoidance are  
19  
20 8 associated with sick leave due to LBP in individuals with physically demanding jobs. We found no  
21  
22 9 association between sick leave due to LBP and high physical workloads, except for number of  
23  
24 10 heavy lifts measured by JEM. Interestingly, the high physical workloads did not modify the risk of  
25  
26 11 sick leave in participants who rate their work as very demanding or with high fear avoidance scores.  
27  
28 12 The poor correlation between JEM variables and self-reported physical demand supports the  
29  
30 13 conclusion, that occupational interventions to reduce sick leave due to LBP should focus more on  
31  
32 14 those who rate their work as very physically demanding and with high fear avoidance beliefs about  
33  
34 15 work, and less on identification of individuals with the objectively highest physical workload.  
35  
36  
37

## 38 16 **Footnotes**

39  
40  
41 17 **Funding:** This work was supported by the Danish Working Environment Research Fund (grant  
42  
43 18 number 09-2012-09).  
44

45 19  
46  
47 20 **Contributorship statement:** JAP, LK, BBH, LMB, EMF, AIK: Study concept and design. JAP,  
48  
49 21 BBH, LMB, AIK: Data acquisition. JAP, BBH, EMF: Statistical analysis. JAP, LK, BBH, LMB,  
50  
51 22 EMF, MB, PH, HB, AIK: Analysis and interpretation of data and critical revision and approval of  
52  
53  
54  
55  
56  
57  
58  
59  
60

1  
2  
3  
4 1 the final manuscript. JAP: Drafting of the manuscript. All authors reviewed drafts and approved the  
5  
6 2 final manuscript.

7  
8  
9 3 **Data sharing statement:** Research records and data collection are obtained according to the Danish  
10  
11 4 Personal Data Act (DPA) guidelines and any extra data is available upon request under the terms of  
12  
13 5 DPA and European GDPR. The authors affirm that this manuscript is an honest, accurate, and  
14  
15 6 transparent account of the study being reported; that no important aspects of the study have been  
16  
17 7 omitted; and that any discrepancies from the study as planned have been explained. Full dataset to  
18  
19 8 replicate the main analysis is available from the corresponding author on reasonable request

20  
21  
22 9 **Competing interests:** there are no competing interests for any author.

23  
24  
25 10 Figure legend: Figure 1: Flow chart for the actual study in the GoBack trial.

26  
27  
28 11

29  
30  
31 12

32  
33  
34 13

35  
36  
37 14

38  
39  
40 15 1 Hoy D, Brooks P, Blyth F, *et al.* The Epidemiology of low back pain. *Best Pract Res Clin Rheumatol*

41  
42 16 2010;**24**:769–81. doi:10.1016/j.berh.2010.10.002

43  
44  
45 17 2 Murray CJL, Barber RM, Foreman KJ, *et al.* Global, regional, and national disability-adjusted life years

46  
47 18 (DALYs) for 306 diseases and injuries and healthy life expectancy (HALE) for 188 countries, 1990-

48  
49 19 2013: Quantifying the epidemiological transition. *Lancet* 2015;**386**:2145–91. doi:10.1016/S0140-

50  
51 20 6736(15)61340-X

52  
53  
54 21 3 Dieleman JL, Baral R, Birger M, *et al.* US Spending on Personal Health Care and Public Health, 1996-

Sick leave due to low back pain.

- 1  
2  
3  
4 1 2013. *Jama* 2016;**316**:2627. doi:10.1001/jama.2016.16885
- 5  
6  
7 2 4 Balagué F, Mannion AF, Pellisé F, *et al.* Non-specific low back pain. *Lancet* 2012;**379**:482–91.  
8  
9 3 doi:10.1016/S0140-6736(11)60610-7
- 10  
11  
12 4 5 Demoulin C, Marty M, Genevay S, *et al.* Effectiveness of preventive back educational interventions  
13  
14 5 for low back pain: A critical review of randomized controlled clinical trials. *Eur Spine J* 2012;**21**:2520–  
15  
16 6 30. doi:10.1007/s00586-012-2445-2
- 17  
18  
19 7 6 Maher CG. A systematic review of workplace interventions to prevent low back pain. *J Osteopath*  
20  
21 8 *Med* 2001;**4**:32. doi:10.1016/S1443-8461(01)80046-0
- 22  
23  
24 9 7 Hilfiker R, Bachmann LM, Heitz CAM, *et al.* Value of predictive instruments to determine persisting  
25  
26 10 restriction of function in patients with subacute non-specific low back pain. Systematic review. *Eur*  
27  
28 11 *Spine J* 2007;**16**:1755–75. doi:10.1007/s00586-007-0433-8
- 29  
30  
31 12 8 Wertli MM, Rasmussen-Barr E, Weiser S, *et al.* The role of fear avoidance beliefs as a prognostic  
32  
33 13 factor for outcome in patients with nonspecific low back pain: A systematic review. *Spine J*  
34  
35 14 2014;**14**:816–36. doi:10.1016/j.spinee.2013.09.036
- 36  
37  
38 15 9 Jensen JN, Karpatschhof B, Labriola M, *et al.* Do fear-avoidance beliefs play a role on the association  
39  
40 16 between low back pain and sickness absence? A prospective cohort study among female health care  
41  
42 17 workers. *J Occup Environ Med* 2010;**52**:85–90. doi:10.1097/JOM.0b013e3181c95b9e
- 43  
44  
45 18 10 Fritz JM, George SZ, Delitto A. The role of fear-avoidance beliefs in acute low back pain:  
46  
47 19 Relationships with current and future disability and work status. *Pain* 2001;**94**:7–15.  
48  
49 20 doi:10.1016/S0304-3959(01)00333-5
- 50  
51  
52 21 11 Andersen LL, Fallentin N, Thorsen SV, *et al.* Physical workload and risk of long-term sickness absence  
53  
54 22 in the general working population and among blue-collar workers: prospective cohort study with  
55  
56  
57  
58  
59  
60

1  
2  
3  
4  
5  
6  
7  
8  
9  
10  
11  
12  
13  
14  
15  
16  
17  
18  
19  
20  
21  
22  
23  
24  
25  
26  
27  
28  
29  
30  
31  
32  
33  
34  
35  
36  
37  
38  
39  
40  
41  
42  
43  
44  
45  
46  
47  
48  
49  
50  
51  
52  
53  
54  
55  
56  
57  
58  
59  
60

- 1 register follow-up. *Occup Environ Med* 2016;**73**:246–53. doi:10.1136/oemed-2015-103314
- 2  
3
- 4 1 12 Lund T, Labriola M, Christensen KB, *et al.* Physical work environment risk factors for long term  
5  
6  
7 sickness absence: prospective findings among a cohort of 5357 employees in Denmark. *Bmj*  
8  
9  
10 2006;**332**:449–52. doi:10.1136/bmj.38731.622975.3A
- 11  
12
- 13 5 13 Sundstrup E, Andersen LL. Hard Physical Work Intensifies the Occupational Consequence of  
14  
15  
16 Physician-Diagnosed Back Disorder: Prospective Cohort Study with Register Follow-Up among  
17  
18  
19 10,000 Workers. *Int J Rheumatol* 2017;**2017**:1037051. doi:10.1155/2017/1037051
- 20  
21
- 22 8 14 Balogh I, Ørbæk P, Ohlsson K, *et al.* Self-assessed and directly measured occupational physical  
23  
24  
25 activities - Influence of musculoskeletal complaints, age and gender. *Appl Ergon* 2004;**35**:49–56.  
26  
27  
28 doi:10.1016/j.apergo.2003.06.001
- 29  
30
- 31 11 15 Hawkes AP, Wilkins JR. Assessing agreement between two job-exposure matrices. *Scand J Work*  
32  
33  
34  
35  
36  
37  
38  
39  
40  
41  
42  
43  
44  
45  
46  
47  
48  
49  
50  
51  
52  
53  
54  
55  
56  
57  
58  
59  
60
- 12 *Environ Health* 1997;**23**:140–8. <http://www.ncbi.nlm.nih.gov/pubmed/9167237>
- 13 16 Rubak TS, Svendsen SW, Andersen JH, *et al.* An expert-based job exposure matrix for large scale  
14  
15  
16 epidemiologic studies of primary hip and knee osteoarthritis: The Lower Body JEM. *BMC*  
17  
18  
19  
20  
21  
22  
23  
24  
25  
26  
27  
28  
29  
30  
31  
32  
33  
34  
35  
36  
37  
38  
39  
40  
41  
42  
43  
44  
45  
46  
47  
48  
49  
50  
51  
52  
53  
54  
55  
56  
57  
58  
59  
60
- 17 *Musculoskelet Disord* 2014;**15**:204. doi:10.1186/1471-2474-15-204
- 18 17 Hansen BB, Kirkeskov L, Christensen R, *et al.* Retention in physically demanding jobs of individuals  
19  
20  
21  
22  
23  
24  
25  
26  
27  
28  
29  
30  
31  
32  
33  
34  
35  
36  
37  
38  
39  
40  
41  
42  
43  
44  
45  
46  
47  
48  
49  
50  
51  
52  
53  
54  
55  
56  
57  
58  
59  
60
- 18 *Trials* 2015;**16**:166.  
doi:10.1186/s13063-015-0684-3
- 19 18 Elm E Von, Altman DG, Egger M, *et al.* guidelines for reporting observational studies Strengthening  
20  
21  
22  
23  
24  
25  
26  
27  
28  
29  
30  
31  
32  
33  
34  
35  
36  
37  
38  
39  
40  
41  
42  
43  
44  
45  
46  
47  
48  
49  
50  
51  
52  
53  
54  
55  
56  
57  
58  
59  
60
- 20 the reporting of observational studies in epidemiology ( STROBE ) statement : guidelines for  
reporting observational studies. *Br Med J* 2007;**335**:19–22. doi:10.1136/bmj.39335.541782.AD
- 21  
22  
23  
24  
25  
26  
27  
28  
29  
30  
31  
32  
33  
34  
35  
36  
37  
38  
39  
40  
41  
42  
43  
44  
45  
46  
47  
48  
49  
50  
51  
52  
53  
54  
55  
56  
57  
58  
59  
60
- 22 19 Gudbergesen H, Bartels EM, Krusager P, *et al.* Test-retest of computerized health status

Sick leave due to low back pain.

- 1  
2  
3  
4 1 questionnaires frequently used in the monitoring of knee osteoarthritis: a randomized crossover  
5  
6 2 trial. *BMC Musculoskelet Disord* 2011;**12**:190. doi:10.1186/1471-2474-12-190  
7  
8  
9 3 20 Waddell G, Newton M, Henderson I, *et al*. A Fear-Avoidance Beliefs Questionnaire (FABQ) and the  
10  
11 4 role of fear-avoidance beliefs in chronic low back pain and disability. *Pain* 1993;**52**:157–68.  
12  
13 5 doi:10.1016/0304-3959(93)90127-B  
14  
15  
16 6 21 George SZ, Fritz JM, Childs JD. Investigation of elevated fear-avoidance beliefs for patients with low  
17  
18 7 back pain: a secondary analysis involving patients enrolled in physical therapy clinical trials. *J Orthop*  
19  
20 8 *Sports Phys Ther* 2008;**38**:50–8. doi:10.2519/jospt.2008.2647  
21  
22  
23 9 22 Statistics Denmark. Danish ISCO-88 classification.  
24  
25 10 1996.<http://www.dst.dk/da/statistik/dokumentation/Nomenklaturer/DISCO-88.aspx>  
26  
27  
28 11 23 Kauppinen T, Uuksulainen S, Saalo A, *et al*. Use of the finnish information system on occupational  
29  
30 12 exposure (FINJEM) in epidemiologic, surveillance, and other applications. *Ann Occup Hyg*  
31  
32 13 2014;**58**:380–96. doi:10.1093/annhyg/met074  
33  
34  
35 14 24 Johns G, Miraglia M. The reliability, validity, and accuracy of self-reported absenteeism from work: a  
36  
37 15 meta-analysis. *J Occup Health Psychol* 2015;**20**:1–14. doi:10.1037/a0037754  
38  
39  
40 16 25 Steenstra IA, Munhall C, Irvin E, *et al*. Systematic Review of Prognostic Factors for Return to Work in  
41  
42 17 Workers with Sub Acute and Chronic Low Back Pain. *J Occup Rehabil* Published Online First: 19  
43  
44 18 September 2016. doi:10.1007/s10926-016-9666-x  
45  
46  
47 19 26 Sundstrup E, Hansen ÅM, Mortensen EL, *et al*. Cumulative occupational mechanical exposures  
48  
49 20 during working life and risk of sickness absence and disability pension: Prospective cohort study.  
50  
51 21 *Scand J Work Environ Heal* 2017;**43**:415–25. doi:10.5271/sjweh.3663  
52  
53  
54 22 27 Wertli MM, Rasmussen-Barr E, Held U, *et al*. Fear-avoidance beliefs—a moderator of treatment  
55  
56  
57  
58  
59  
60

1  
2  
3  
4  
5  
6  
7  
8  
9  
10  
11  
12  
13  
14  
15  
16  
17  
18  
19  
20  
21  
22  
23  
24  
25  
26  
27  
28  
29  
30  
31  
32  
33  
34  
35  
36  
37  
38  
39  
40  
41  
42  
43  
44  
45  
46  
47  
48  
49  
50  
51  
52  
53  
54  
55  
56  
57  
58  
59  
60

- 1 efficacy in patients with low back pain: a systematic review. *Spine J* 2014;**14**:2658–78.
- 2 doi:10.1016/j.spinee.2014.02.033
- 3 28 Sundstrup E, Hansen ÅM, Mortensen EL, *et al*. Retrospectively assessed physical work environment
- 4 during working life and risk of sickness absence and labour market exit among older workers. *Occup*
- 5 *Environ Med* 2017;:oemed-2016-104279. doi:10.1136/oemed-2016-104279
- 6 29 Alexopoulos EC, Konstantinou EC, Bakoyannis G, *et al*. Risk factors for sickness absence due to low
- 7 back pain and prognostic factors for return to work in a cohort of shipyard workers. *Eur Spine J*
- 8 2008;**17**:1185–92. doi:10.1007/s00586-008-0711-0
- 9 30 Iljzenberg W, Burdorf a. Risk factors for musculoskeletal symptoms and ensuing health care use
- 10 and sick leave. *Spine (Phila Pa 1976)* 2005;**30**:1550–6. doi:10.1097/01.brs.0000167533.83154.28
- 11 31 Steenstra IA, Verbeek JH, Heymans MW, *et al*. Prognostic factors for duration of sick leave in
- 12 patients sick listed with acute low back pain: a systematic review of the literature. *Occup Environ*
- 13 *Med* 2005;**62**:851–60. doi:10.1136/oem.2004.015842
- 14 32 Hoogendoorn WE, Bongers PM, de Vet HCW, *et al*. High physical work load and low job satisfaction
- 15 increase the risk of sickness absence due to low back pain: results of a prospective cohort study.
- 16 *Occup Environ Med* 2002;**59**:323–8. <http://www.ncbi.nlm.nih.gov/pubmed/11983847>

1  
2  
3  
4  
5  
6  
7  
8  
9  
10  
11  
12  
13  
14  
15  
16  
17  
18  
19  
20  
21  
22  
23  
24  
25  
26  
27  
28  
29  
30  
31  
32  
33  
34  
35  
36  
37  
38  
39  
40  
41  
42  
43  
44  
45  
46  
47  
48  
49  
50  
51  
52  
53  
54  
55  
56  
57  
58  
59  
60

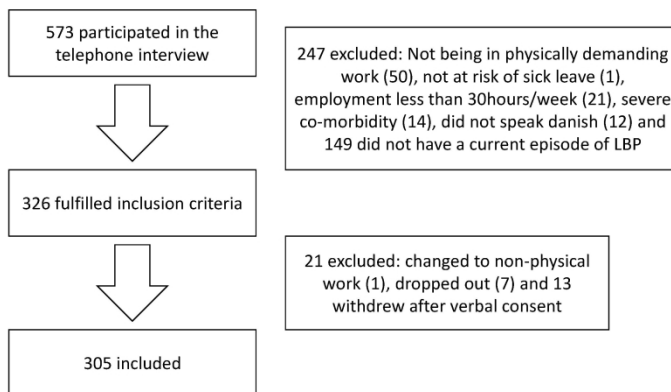

338x190mm (300 x 300 DPI)



STROBE Statement—Checklist of items that should be included in reports of *cross-sectional studies*

|                              | Item No | Recommendation                                                                                                                                                                                               | Page No  |
|------------------------------|---------|--------------------------------------------------------------------------------------------------------------------------------------------------------------------------------------------------------------|----------|
| <b>Title and abstract</b>    | 1       | (a) Indicate the study's design with a commonly used term in the title or the abstract                                                                                                                       | 1        |
|                              |         | (b) Provide in the abstract an informative and balanced summary of what was done and what was found                                                                                                          | 2        |
| <b>Introduction</b>          |         |                                                                                                                                                                                                              |          |
| Background/rationale         | 2       | Explain the scientific background and rationale for the investigation being reported                                                                                                                         | 4        |
| Objectives                   | 3       | State specific objectives, including any prespecified hypotheses                                                                                                                                             | 5        |
| <b>Methods</b>               |         |                                                                                                                                                                                                              |          |
| Study design                 | 4       | Present key elements of study design early in the paper                                                                                                                                                      | 5        |
| Setting                      | 5       | Describe the setting, locations, and relevant dates, including periods of recruitment, exposure, follow-up, and data collection                                                                              | 5-6      |
| Participants                 | 6       | (a) Give the eligibility criteria, and the sources and methods of selection of participants                                                                                                                  | 5-6      |
| Variables                    | 7       | Clearly define all outcomes, exposures, predictors, potential confounders, and effect modifiers. Give diagnostic criteria, if applicable                                                                     | 6-7      |
| Data sources/<br>measurement | 8*      | For each variable of interest, give sources of data and details of methods of assessment (measurement). Describe comparability of assessment methods if there is more than one group                         | 6-7      |
| Bias                         | 9       | Describe any efforts to address potential sources of bias                                                                                                                                                    | 7-8      |
| Study size                   | 10      | Explain how the study size was arrived at                                                                                                                                                                    | 8        |
| Quantitative variables       | 11      | Explain how quantitative variables were handled in the analyses. If applicable, describe which groupings were chosen and why                                                                                 | 7-8      |
| Statistical methods          | 12      | (a) Describe all statistical methods, including those used to control for confounding                                                                                                                        | 7-8      |
|                              |         | (b) Describe any methods used to examine subgroups and interactions                                                                                                                                          | 7-8      |
|                              |         | (c) Explain how missing data were addressed                                                                                                                                                                  | 7-8      |
|                              |         | (d) If applicable, describe analytical methods taking account of sampling strategy                                                                                                                           | 7-8      |
|                              |         | (e) Describe any sensitivity analyses                                                                                                                                                                        |          |
| <b>Results</b>               |         |                                                                                                                                                                                                              |          |
| Participants                 | 13*     | (a) Report numbers of individuals at each stage of study—eg numbers potentially eligible, examined for eligibility, confirmed eligible, included in the study, completing follow-up, and analysed            | 8        |
|                              |         | (b) Give reasons for non-participation at each stage                                                                                                                                                         | 8        |
|                              |         | (c) Consider use of a flow diagram                                                                                                                                                                           | Figure 1 |
| Descriptive data             | 14*     | (a) Give characteristics of study participants (eg demographic, clinical, social) and information on exposures and potential confounders                                                                     | 9        |
|                              |         | (b) Indicate number of participants with missing data for each variable of interest                                                                                                                          | 9        |
| Outcome data                 | 15*     | Report numbers of outcome events or summary measures                                                                                                                                                         | 9        |
| Main results                 | 16      | (a) Give unadjusted estimates and, if applicable, confounder-adjusted estimates and their precision (eg, 95% confidence interval). Make clear which confounders were adjusted for and why they were included | 9        |

|                          |    |                                                                                                                                                                            |        |
|--------------------------|----|----------------------------------------------------------------------------------------------------------------------------------------------------------------------------|--------|
|                          |    | (b) Report category boundaries when continuous variables were categorized                                                                                                  | tables |
|                          |    | (c) If relevant, consider translating estimates of relative risk into absolute risk for a meaningful time period                                                           |        |
| Other analyses           | 17 | Report other analyses done—eg analyses of subgroups and interactions, and sensitivity analyses                                                                             | 11     |
| <b>Discussion</b>        |    |                                                                                                                                                                            |        |
| Key results              | 18 | Summarise key results with reference to study objectives                                                                                                                   | 12     |
| Limitations              | 19 | Discuss limitations of the study, taking into account sources of potential bias or imprecision. Discuss both direction and magnitude of any potential bias                 | 13     |
| Interpretation           | 20 | Give a cautious overall interpretation of results considering objectives, limitations, multiplicity of analyses, results from similar studies, and other relevant evidence | 14     |
| Generalisability         | 21 | Discuss the generalisability (external validity) of the study results                                                                                                      | 14     |
| <b>Other information</b> |    |                                                                                                                                                                            |        |
| Funding                  | 22 | Give the source of funding and the role of the funders for the present study and, if applicable, for the original study on which the present article is based              | 16     |

\*Give information separately for exposed and unexposed groups.

**Note:** An Explanation and Elaboration article discusses each checklist item and gives methodological background and published examples of transparent reporting. The STROBE checklist is best used in conjunction with this article (freely available on the Web sites of PLoS Medicine at <http://www.plosmedicine.org/>, Annals of Internal Medicine at <http://www.annals.org/>, and Epidemiology at <http://www.epidem.com/>). Information on the STROBE Initiative is available at [www.strobe-statement.org](http://www.strobe-statement.org).

# BMJ Open

## Physical demand at work and sick leave due to low back pain - a cross sectional study

|                                 |                                                                                                                                                                                                                                                                                                                                                                                                                                                                                                                                                                                                                                                                                                                                                                                                                                                                                                                                                                                                                                                                                                                                                                                                                                                                                        |
|---------------------------------|----------------------------------------------------------------------------------------------------------------------------------------------------------------------------------------------------------------------------------------------------------------------------------------------------------------------------------------------------------------------------------------------------------------------------------------------------------------------------------------------------------------------------------------------------------------------------------------------------------------------------------------------------------------------------------------------------------------------------------------------------------------------------------------------------------------------------------------------------------------------------------------------------------------------------------------------------------------------------------------------------------------------------------------------------------------------------------------------------------------------------------------------------------------------------------------------------------------------------------------------------------------------------------------|
| Journal:                        | <i>BMJ Open</i>                                                                                                                                                                                                                                                                                                                                                                                                                                                                                                                                                                                                                                                                                                                                                                                                                                                                                                                                                                                                                                                                                                                                                                                                                                                                        |
| Manuscript ID                   | bmjopen-2018-026917.R1                                                                                                                                                                                                                                                                                                                                                                                                                                                                                                                                                                                                                                                                                                                                                                                                                                                                                                                                                                                                                                                                                                                                                                                                                                                                 |
| Article Type:                   | Research                                                                                                                                                                                                                                                                                                                                                                                                                                                                                                                                                                                                                                                                                                                                                                                                                                                                                                                                                                                                                                                                                                                                                                                                                                                                               |
| Date Submitted by the Author:   | 06-Dec-2018                                                                                                                                                                                                                                                                                                                                                                                                                                                                                                                                                                                                                                                                                                                                                                                                                                                                                                                                                                                                                                                                                                                                                                                                                                                                            |
| Complete List of Authors:       | <p>Aavang Petersen, Jonathan; Copenhagen University Hospital Bispebjerg and Frederiksberg, Department of Occupational and Environmental Medicine</p> <p>Kirkeskov, Lilli; Copenhagen University Hospital Bispebjerg and Frederiksberg, Department of Occupational and Environmental Medicine, Unit of Social Medicine</p> <p>Hansen, Bjarke; Copenhagen University Hospital, Bispebjerg and Frederiksberg Hospital, The Parker Institute, Department of Rheumatology</p> <p>Begtrup, Luise; Copenhagen University Hospital Bispebjerg and Frederiksberg, Department of Occupational and Environmental Medicine</p> <p>Flachs, Esben; Copenhagen University Hospital Bispebjerg and Frederiksberg, Department of Occupational and Environmental Medicine</p> <p>Boesen, Mikael; Copenhagen University Hospital, Bispebjerg and Frederiksberg Hospital, Department of Radiology</p> <p>Hansen, Philip; Copenhagen University Hospital, Bispebjerg and Frederiksberg, Department of Radiology</p> <p>Bliddal, Henning; Copenhagen University Hospital, Bispebjerg and Frederiksberg Hospital, The Parker Institute, Department of Rheumatology</p> <p>Kryger, Ann; Copenhagen University Hospital Bispebjerg and Frederiksberg, Department of Occupational and Environmental Medicine</p> |
| <b>Primary Subject Heading</b>: | Occupational and environmental medicine                                                                                                                                                                                                                                                                                                                                                                                                                                                                                                                                                                                                                                                                                                                                                                                                                                                                                                                                                                                                                                                                                                                                                                                                                                                |
| Secondary Subject Heading:      | Rheumatology                                                                                                                                                                                                                                                                                                                                                                                                                                                                                                                                                                                                                                                                                                                                                                                                                                                                                                                                                                                                                                                                                                                                                                                                                                                                           |
| Keywords:                       | OCCUPATIONAL & INDUSTRIAL MEDICINE, PREVENTIVE MEDICINE, REHABILITATION MEDICINE, RHEUMATOLOGY                                                                                                                                                                                                                                                                                                                                                                                                                                                                                                                                                                                                                                                                                                                                                                                                                                                                                                                                                                                                                                                                                                                                                                                         |
|                                 |                                                                                                                                                                                                                                                                                                                                                                                                                                                                                                                                                                                                                                                                                                                                                                                                                                                                                                                                                                                                                                                                                                                                                                                                                                                                                        |

SCHOLARONE™  
Manuscripts

1  
2  
3  
4 1 Physical demand at work and sick leave due to low back pain - a cross sectional study

5  
6  
7  
8 2 Jonathan Aavang Petersen, MD†, Lilli Kirkeskov, PhD†, Bjarke Brandt Hansen, PhD\*, Luise

9  
10 3 Mølenberg Begtrup, PhD†, Esben Meulengracht Flachs, PhD†, Michael Boesen, PhD#, Phillip

11  
12 4 Hansen, PhD#, Henning Bliddal, DMSc\* and Ann Isabel Kryger, PhD†

13  
14  
15 5 † Department of Occupational and Environmental Medicine, Copenhagen University Hospital,

16  
17 6 Bispebjerg and Frederiksberg, Denmark. \*The Parker Institute, Department of Rheumatology,

18  
19 7 Copenhagen University Hospital, Bispebjerg and Frederiksberg Hospital, Copenhagen, Denmark.

20  
21 8 #Department of Radiology, Copenhagen University Hospital, Bispebjerg and Frederiksberg

22  
23 9 Hospital

24  
25  
26  
27  
28 10 **Corresponding author details and contacts:**

29  
30 11 Jonathan Aavang Petersen, MD

31  
32  
33 12 Department of Occupational and Environmental Medicine, Copenhagen University Hospital

34  
35 13 Bispebjerg and Frederiksberg, Bispebjerg Bakke 23, DK-2400 Copenhagen NV

36  
37  
38 14 E-mail: jonathanaavang@hotmail.com

39  
40  
41 15

42  
43  
44 16

45  
46  
47 17

48  
49  
50 18

51  
52  
53 19

54  
55  
56 20

57  
58  
59  
60

Sick leave due to low back pain.

1  
2  
3  
4 **1 Abstract**  
5

6  
7 **2 Objectives:** To investigate if self-reported high physical demand at work, objective physical  
8  
9  
10  
11  
12  
13  
14  
15  
16  
17  
18  
19  
20  
21  
22  
23  
24  
25  
26  
27  
28  
29  
30  
31  
32  
33  
34  
35  
36  
37  
38  
39  
40  
41  
42  
43  
44  
45  
46  
47  
48  
49  
50  
51  
52  
53  
54  
55  
56  
57  
58  
59  
60  
**3** workload using a job exposure matrix (JEM) and fear avoidance beliefs are risk factors for sick  
**4** leave in persons with low back pain (LBP). Secondly, to investigate if the effects of fear avoidance  
**5** and self-reported high physical demand at work on sick leave are modified by the objective physical  
**6** workloads.

**7 Settings:** Participants were recruited from general practice and by advertisement in a local  
**8** newspaper.

**9 Participants:** 305 participants with LBP, a current period of 2 to 4 weeks and self-reported  
**10** difficulty in maintaining physically demanding jobs due to LBP were interviewed, clinically  
**11** examined and had an MRI at baseline.

**12 Main outcome measures:** Independent variables were high fear avoidance, self-reported high  
**13** physical demand at work and objective measures of physical workloads (JEM). Outcome was self-  
**14** reported sick leave due to LBP in the previous year. Logistic regression and tests for interaction  
**15** were used to identify risk factors and modifiers for the association with self-reported sick leave.

**16 Results:** Self-reported physically demanding work and high fear avoidance were significantly  
**17** associated with prior sick leave due to LBP with OR 1.75 95%CI (1.10-2.75) and 2.75 95%CI  
**18** (1.61-4.84) respectively. No objective physical workloads had significant associations. There was  
**19** no modifying effect of objective physical workloads on the association between self-reported  
**20** physical demand at work/ high fear avoidance and sick leave.

**21 Conclusions:** Occupational interventions to reduce sick leave due to LBP should focus more on  
**22** those with high self-reported physical demands and high fear avoidance, and less on individuals  
**23** with the objectively highest physical workload.

**24 Trial registration:** The GoBack trial was registered with ClinicalTrials.gov (identifier:  
**25** NCT02015572) on 29 November 2013

1  
2  
3  
4 15  
6  
7 2 **Strength and limitations of this study.**  
8  
910 3 • By using fear avoidance score and self-reported workload together with a job exposure  
11  
12 4 matrix in the investigation of an association with sick leave, the validity problem with self-  
13  
14 5 reported exposures has been reduced  
15  
1617 6 • The study population consisted of workers with low back pain and a physically demanding  
18  
19 7 work, which is a clinically relevant sample of participants.  
2021 8 • Workers with low back pain but no self-reported physically demanding work were not  
22  
23 9 included in the study with risk of lacking contrast among the included participants and thus  
24  
25 10 risk of underestimation of associations.  
26  
2728 11 • Use of job exposure matrices and dichotomizing of the exposure data without a golden  
29  
30 12 standard regarding cut-off values entails risk of misclassification of exposure.  
31  
32  
33 13  
34  
35  
36 14  
37  
38  
39 15  
40  
41  
42 16  
43  
44  
45  
46 17  
47  
48  
49 18  
50  
51  
52 19  
53  
54  
55 20  
56  
57  
58 21  
59  
60

Sick leave due to low back pain.

## 1 INTRODUCTION

### 2 Background

3 Low back pain (LBP) is a common musculoskeletal disorder and is one of the leading causes of  
4 disability for the working population. [1,2] In Denmark, back pain is estimated to accumulate 4.8  
5 billion DKr in annual loss of productivity.[3]

6 The risk factors for developing LBP are believed to be a complex combination of both mechanical  
7 and physiological factors, and psychological, social and cultural factors.[4] Systematic reviews have  
8 concluded that no single intervention is likely to be effective to prevent LBP, due to its  
9 multidimensional nature.[5–7]

10 Psychological factors such as high fear avoidance beliefs (FAB) has proven to be an important  
11 prognostic factor for poor outcome in patients with nonspecific LBP[8] and as such have a  
12 predictive effect on sick leave. [9,10] FAB is believed to influence the perception of pain resulting  
13 in catastrophizing, fear and avoidance of physical activities. This leads to a vicious cycle of fear  
14 avoidance behaviour, physical deterioration and social isolation – factors which may affect the  
15 ability to stay in job.[10]

16 Self-reported workload exposures have been investigated as risk factors for LBP in the majority of  
17 studies [11–13] despite the fact, that self-reported workload exposures may entail a validity problem  
18 as individuals with musculoskeletal complaints tend to overestimate their exposures.[14], A job  
19 exposure matrix (JEM) is a classification system linking occupation and industry titles with job-  
20 related exposures.[15] This could be more accurate estimating the real exposure of physical  
21 demands because of reduction misclassification of exposure. However, we do not know if a JEM is  
22 better at predicting risk of sick leave. JEMs have been shown to be an independent and valid

1  
2  
3  
4 1 measurement of physical demands in patients with primary hip and knee osteoarthritis [16], may be  
5  
6 2 useful in the assessment of exposure for LBP patients, and be associated with sick leave.  
7  
8

### 9 3 **Objective**

10  
11  
12 4 The objective of the study was 1) to investigate to what degree self-reported high physical demand  
13  
14 5 at work, physical workload using the job exposure matrix and fear avoidance beliefs are associated  
15  
16 6 with sick leave in a group of persons with low back pain and 2) if the association between fear  
17  
18 7 avoidance or self-reported high physical demand at work and sick leave is modified by the objective  
19  
20 8 measures of physical workloads.  
21  
22  
23

## 24 9 **METHODS**

### 25 10 **Design and Ethics**

26  
27  
28 11 The study was based on cross-sectional baseline data from a randomized controlled trial (the  
29  
30 12 GoBack trial, NCT02015572) [17] and reported in accordance with the Strengthening the Reporting  
31  
32 13 of Observational Studies in Epidemiology guidelines – the STROBE.[18] All participants gave  
33  
34 14 written informed consent before enrolment and the study was approved by the local ethics  
35  
36 15 committee (H-3-2013-161) and the Danish Data Protection Agency ((DPA approval number 2014-  
37  
38 16 41-2673).  
39  
40  
41  
42  
43  
44  
45

### 46 18 **Participants and setting**

47  
48 19 Participants between 18 and 65 years of age with a current episode of 2 to 4 weeks of LBP and a  
49  
50 20 self-reported physically demanding job were recruited from general practice, the outpatient clinic of  
51  
52 21 the Department of Rheumatology, Frederiksberg Hospital, Denmark and by advertisement in a local  
53  
54 22 newspaper. Potential participants were interviewed by telephone and screened for inclusion.  
55  
56 23 Participants responded to “How physically demanding is your current job?” Response categories  
57  
58  
59  
60



Sick leave due to low back pain.

1  
2  
3  
4 1 were: “Very demanding, demanding, not very demanding, not at all demanding.” Only those responding  
5  
6 2 demanding or very demanding were included. Furthermore, the participants needed to express  
7  
8 3 concerns about the ability to maintain their current job (yes/no) and they had to have current  
9  
10 4 employment for at least 30 hours/week. Individuals with pregnancy, other severe somatic or  
11  
12 5 psychiatric disease, cancer or metastatic disease, severe co-morbidity, treatment or referral to  
13  
14 6 outside providers (for example surgery) or contraindications for having a conventional MRI were  
15  
16 7 not included.  
17  
18  
19  
20

## 21 8 **Variables**

22  
23  
24 9 At the first visit (baseline) participants filled in a battery of questionnaires on a validated touch  
25  
26 10 screen[19], underwent a physical examination and an MRI. The questionnaires investigated  
27  
28 11 demographic information, comorbidity, job-category, previous history of LBP, physically  
29  
30 12 demanding work, leisure-time, physical activity, psychosocial work environment, general health  
31  
32 13 status, history of work-related factors, work ability, back-specific disability, fear avoidance beliefs,  
33  
34 14 pain score and sick leave due to LBP. Diagnosis was based on symptoms, clinical examination and  
35  
36 15 MRI.  
37  
38  
39  
40

41 16 Sick leave due to LBP was recorded by answering the following questions at baseline: “how many  
42  
43 17 days of sick leave have you had due to LBP in the previous year?” Categorized as short (1-7 days),  
44  
45 18 medium (8-30 days), long (31-90 days), very long (over 90 days) or every day. Sick leave due to  
46  
47 19 LBP was then dichotomized as low (1-7 days/year) and high ( $\geq 8$ days/year) due to overall low sick  
48  
49 20 leave among the participants.  
50  
51  
52

53 21 Fear avoidance beliefs was assessed with the 16-item Fear-Avoidance Beliefs Questionnaire  
54  
55 22 (FABQ).[20] FABQ-W is the sum of seven items (score range 0-42 points) with each item scored  
56  
57  
58  
59  
60

1  
2  
3  
4 1 on a seven-point Likert scale from strongly disagree (0-points) to strongly agree (6-points). We  
5  
6 2 defined high fear avoidance beliefs as FABQ-W>20 points.[21]  
7  
8  
9  
10 3 Physically demanding work was evaluated both by self-report (having a very demanding or having  
11  
12 4 a demanding current job) and with the use of the Lower Body Job Exposure Matrix (JEM).[16]  
13  
14  
15 5 Job titles from the baseline questionnaires were transformed into an occupational title in the Danish  
16  
17 6 version of the International Standard Classification of Occupations (D-ISCO-88).[22] The JEM  
18  
19 7 consisted of 168 D-ISCO codes which were divided into 121 job groups. Occupational medicine  
20  
21 8 experts assessed physical exposures during a working day and estimated time sitting, time  
22  
23 9 standing/walking, time with whole body vibration, time kneeling, and lifting (cumulated weight and  
24  
25 number of heavy lifts>20 kg) in different jobs. The JEM did not include all job titles. Therefore, we  
26  
27 10 matched missing job titles to a similar existing job title and exposure in the JEM. This was done by  
28  
29 11 consensus preceded by independent matching by two occupational medicine experts. We  
30  
31 12 dichotomized JEM variables according to median values to maximize strength of data and tested  
32  
33 13 other exposure levels (standing/walking > 6 hours/day, lifting a total of >1000 kg/day and lifting  
34  
35 14 over 20kgs > 15 times/day).

## 41 16 **Statistical methods**

42  
43 17 Descriptive data are reported as point estimates (either frequency or mean and standard deviation  
44  
45 [SD]); the correlation between self-reported physical demand at work and FABQ-W>20 was  
46  
47 18 calculated as Spearman's rank correlation. We used a series of multivariate logistic regression  
48  
49 19 models to investigate each measure from the Lower Body JEM separately. The models investigated  
50  
51 20 the association between dichotomized sick leave due to LBP  $\geq$  8 days compared to 1-7 days during  
52  
53 21 the previous year (outcome) and either self-reported physical demand at work, fear avoidance, or  
54  
55 22 objective workload (JEM), all adjusted for age and sex. Analyses of the modifying effects of  
56  
57 23  
58  
59  
60

Sick leave due to low back pain.

1  
2  
3  
4 1 specific independent variables on effect of self-reported exposure were performed by adding an  
5  
6 2 interaction term between the objective (JEM) and self-reported exposure (e.g. FABQ-W and self-  
7  
8 reported physically demanding work) to the regression model. Statistical analyses for descriptive  
9 3  
10 4 data were done using SAS version 9.2 (SAS Institute IC, Cary, NC, USA) and regression analysis  
11  
12 5 were done using R® v 3.2.2 (R: A Language and Environment for Statistical Computing, R  
13  
14 6 Foundation for Statistical Computing, Vienna, Austria, 2016, <https://www.R-project.org>). All  
15  
16 7 analyses used a significance level of 0.05.  
17  
18  
19  
20

## 21 8 **Patient and public involvement**

22  
23  
24 9 Patients or the general public were not involved in the design or development of the study.  
25  
26

## 27 10 **RESULTS**

### 28 11 **Participants**

29  
30 12 Based on the telephone interview 274 participants out of 573 interviewed were excluded, mainly  
31  
32 13 due to not having a current episode of LBP or not having a physically demanding job. Of the 326  
33  
34 14 enrolled participants 305 participants came to the first visit and were included in the study, see  
35  
36 15 Figure 1. A total of 55 job titles (48 among male and 24 among women) were represented and 41  
37  
38 16 participants were reassigned a new job title with similar exposure group due to lacking presence in  
39  
40 17 the JEM (data not shown).  
41  
42  
43  
44  
45

### 46 18 **Descriptive data**

47  
48  
49 19 Participant characteristics are shown in table 1.  
50  
51  
52  
53 20  
54  
55  
56 21  
57  
58  
59 22  
60

Table 1 Characteristics of the participants (N=305)

|                                                    | Total |         | Self-reported physical demand |         |           |          | P-value |
|----------------------------------------------------|-------|---------|-------------------------------|---------|-----------|----------|---------|
|                                                    |       |         | Very demanding                |         | Demanding |          |         |
|                                                    | Total | (%)     | Very demanding                | (%)     | Demanding | (%)      |         |
|                                                    | 305   | (100%)  | 144                           | (47.2%) | 161       | (52.8%)  |         |
| <b>Age, years, Mean ±SD</b>                        | 45.5  | ± 10.3  | 47.5                          | ±9.8    | 43.3      | ±10.3    | <0.001* |
| <b>Males, n (%)</b>                                | 206   | (67.5%) | 96                            | (66.7%) | 110       | (68.3%)  | 0.853+  |
| <b>Current Smoking</b>                             |       |         |                               |         |           |          | 0.004+  |
| Yes, n (%)                                         | 112   | (36.7%) | 63                            | (43.8%) | 49        | (30.43%) |         |
| No, n (%)                                          | 193   | (63.3%) | 81                            | (56.3%) | 112       | (69.6%)  |         |
| <b>BMI (kg/m<sup>2</sup>)</b>                      | 26.9  | ± 4.2   | 27.2                          | ±4.1    | 26.7      | ±4.4     | 0.278*  |
| <b>Actual sick leave due to LBP, n (%)</b>         | 34    | (11.2%) | 23                            | (16.0%) | 11        | (6.8%)   | 0.020+  |
| <b>Sick leave due to LBP last year</b>             |       |         |                               |         |           |          | 0.069+  |
| 1-7 days, n (%)                                    | 168   | (55.1%) | 69                            | (47.9%) | 99        | (61.5%)  |         |
| 8-30 days, n (%)                                   | 104   | (34.1%) | 104                           | (38.9%) | 56        | (29.8%)  |         |
| 31-90 days, n (%)                                  | 25    | (8.2%)  | 13                            | (9.0%)  | 12        | (7.5%)   |         |
| >90 days, n (%)                                    | 8     | (2.6%)  | 2                             | (4.2%)  | 6         | (1.2%)   |         |
| <b>Physical demanding workloads</b>                |       |         |                               |         |           |          |         |
| Standing/walking > 5.44 hours/day, n (%)           | 147   | (48.2%) | 69                            | (47.9%) | 78        | (48.5%)  | 0.328+  |
| Lifting >650 kg/day, n (%)                         | 148   | (48.5%) | 77                            | (53.5%) | 71        | (44.1%)  | 0.128+  |
| Number of heavy lifts > 7.7 times/day, n (%)       | 145   | (47.5%) | 75                            | (52.1%) | 70        | (43.5%)  | 0.165+  |
| <b>Clinical symptoms</b>                           |       |         |                               |         |           |          | 0.468+  |
| LBP, n (%)                                         | 170   | (55.7%) | 85                            | (59.0%) | 85        | (52.8%)  |         |
| LBP and + additional sciatica, n (%)               | 86    | (28.2%) | 36                            | (25.0%) | 50        | (31.1%)  |         |
| LBP and + additional radiating pain, n (%)         | 49    | (16.1%) | 23                            | (16.0%) | 26        | (16.2%)  |         |
| <b>Primary diagnosis<sup>#</sup></b>               |       |         |                               |         |           |          | 0.498+  |
| Spondylosis, n (%)                                 | 155   | (50.8%) | 68                            | (47.2%) | 87        | (54.0%)  |         |
| Herniated disc, n (%)                              | 48    | (15.7%) | 23                            | (16.0%) | 25        | (15.5%)  |         |
| Spondylolisthesis, n (%)                           | 23    | (7.5%)  | 11                            | (7.6%)  | 12        | (7.5%)   |         |
| Spinal stenosis, n (%)                             | 12    | (3.9%)  | 4                             | (2.8%)  | 8         | (5.0%)   |         |
| Unspecific LBP, n (%)                              | 46    | (15.1%) | 24                            | (16.7%) | 22        | (13.7%)  |         |
| Spondyloarthritis, n (%)                           | 13    | (4.3%)  | 9                             | (6.3%)  | 4         | (2.5%)   |         |
| Other, n (%)                                       | 8     | (2.6%)  | 5                             | (3.5%)  | 3         | (1.9%)   |         |
| <b>Current job<sup>#</sup></b>                     |       |         |                               |         |           |          | 0.816+  |
| Disco 1, 2: professionals and high educated, n (%) | 21    | (6.9%)  | 9                             | (6.3%)  | 12        | (7.5%)   |         |
| Disco 3, 4, 5: office, teaching and nursing, n (%) | 99    | (33.8%) | 47                            | (32.6%) | 56        | (34.8%)  |         |
| Disco 6, 7, 8, 9: blue collar, n (%)               | 181   | (59.3%) | 88                            | (61.1%) | 93        | (57.7%)  |         |
| <b>Pain intensity (VAS 0-10)</b>                   |       |         |                               |         |           |          |         |
| Average last 4 weeks, Mean ±SD                     | 5.6   | ± 1.9   | 5.3                           | ±1.9    | 5.99      | ±1.9     | 0.002*  |
| Actual, Mean ±SD                                   | 4.5   | ± 2.1   | 4.3                           | ±2.1    | 4.7       | ±2.0     | 0.105*  |
| Highest intensity last 4 weeks, Mean ±SD           | 7.1   | ± 2.0   | 6.75                          | ±2.0    | 7.5       | ±2.0     | <0.001* |
| <b>Fear Avoidance Beliefs</b>                      |       |         |                               |         |           |          | <0.001+ |
| Low (0-20), n (%)                                  | 83    | (27.2%) | 23                            | (16.0%) | 60        | (37.3%)  |         |
| High (21-42), n (%)                                | 222   | (72.8%) | 121                           | (84.0%) | 101       | (62.7%)  |         |
| (0-42), Mean ±SD                                   | 25.0  | ± 7.4   | 22.6                          | ±7.03   | 27.8      | ±6.9     | <0.001* |

†Based on symptoms, clinical examination and MRI. \*t-test, +X<sup>2</sup>-test, # Danish version of the International Standard Classification of Occupations

Values are percentages of participants or mean and SDs.

BMI; body mass index, VAS; visual analog scale, FABQ; Fear Avoidance Beliefs Questionnaire. LBP; low back pain

1  
2  
3  
4 1 Overall there was a low rate of sick leave due to LBP with 89.2% participants having less than one  
5  
6 2 month of sick leave during the last 12 months.

7  
8  
9  
10 3 Participants reporting work as very physically demanding also had the lowest mean FAB, lowest  
11  
12 4 current and average pain intensity and were more seldom smokers than participants reporting work  
13  
14 5 as physically demanding.

15  
16  
17 6 Participants with a self-reported very physically demanding job were slightly, but significantly  
18  
19 7 older compared to participants who only reported their job demanding. There were no significant  
20  
21 8 differences regarding sex, BMI, JEM or educational level.

### 22 9 **Factors associated with sick leave due to LBP**

23  
24  
25  
26  
27  
28 10 High self-reported physical demand and high fear avoidance beliefs (FABQ-W>20) were both  
29  
30 11 significantly associated with sick leave due to LBP  $\geq 8$  days per year with OR 1.75 (95% CI 1.10-  
31  
32 12 2.75) and 2.75 (95% CI 1.61-4.84), respectively. After adjustment for age and sex, there was still a  
33  
34 13 strong association, see table 2.

35  
36  
37  
38 Table 2: Crude and adjusted odds ratio for sick leave due to LBP  
39 according to self-rated physical demand, fear avoidance beliefs and  
40 physical demanding workloads, respectively.

|                                          | Unadjusted OR<br>(95%CI) | P-value | Adjusted* OR<br>(95%CI) | P-value |
|------------------------------------------|--------------------------|---------|-------------------------|---------|
| <b>Self-rated physical demand</b>        |                          |         |                         |         |
| Demanding                                | 1                        |         | -                       | -       |
| Very demanding                           | 1.75 (1.10-2.75)         | 0.018   | 1.60(1.00-2.56)         | 0.050   |
| <b>Fear avoidance beliefs</b>            |                          |         |                         |         |
| FABQ-W $\leq$ 20 <sup>+</sup>            | 1                        |         | -                       | -       |
| FABQ-W>20 <sup>+</sup>                   | 2.75 (1.61-4.84)         | <0.001  | 2.67 (1.55-4.73)        | 0.001   |
| <b>Physical demanding workloads</b>      |                          |         |                         |         |
| Standing/walking > 5.44 hours/day        | 0.85 (0.5-1.34)          | 0.485   | 0.84 (0.53-1.33)        | 0.462   |
| Lifting >650 kg/day                      | 1.41 (0.90-2.23)         | 0.134   | 1.38 (0.87-2.18)        | 0.174   |
| Number of heavy lifts > 7.7<br>times/day | 1.60 (1.02-2.53)         | 0.041   | 1.57 (0.99-2.50)        | 0.056   |

41  
42  
43  
44  
45  
46  
47  
48  
49  
50  
51  
52  
53  
54 \* Adjusted for sex and age, + Fear-Avoidance Beliefs Questionnaire-in relation to Work

55 14

1  
2  
3  
4 1 There was a positive association of lifting loads over 20 kg more than 7.7 times per day measured  
5  
6 2 by JEM, which was borderline statistically significant after adjustment. None of the other physical  
7  
8 3 workloads were significantly associated with sick leave due to LBP. There was very low exposure  
9  
10 4 to kneeling and whole-body vibration and thus these exposures were not included in the analyses.  
11  
12  
13

## 14 5 **Interactions**

16  
17 6 Physical demanding workloads did not modify the association between self-reported physical  
18  
19 7 demand and sick leave due to LBP (table 3).  
20  
21  
22

23 Table 3: Modifying effects of specific independent exposures on the association  
24 between self-reported physical demand and sick leave due to LBP.

|                                       | Interaction OR* (95%CI) | P-value |
|---------------------------------------|-------------------------|---------|
| <b>Fear avoidance beliefs</b>         |                         |         |
| FABQ-W>20 <sup>+</sup>                | 1.27 (0.39-4.32)        | 0.70    |
| <b>Physical demanding workloads</b>   |                         |         |
| Standing/walking > 5.44 hours/day     | 0.74 (0.29-1.86)        | 0.52    |
| Standing/walking > 6 hours/day        | 1.21 (0.37-4.02)        | 0.76    |
| Lifting >650 kg/day                   | 0.63 (0.24-1.59)        | 0.32    |
| Lifting >1000 kg/day                  | 0.99 (0.37-2.64)        | 0.97    |
| Number of heavy lifts > 7.7 times/day | 0.75 (0.29-1.90)        | 0.4     |
| Number of heavy lifts > 15 times/day  | 1.09 (0.28-4.39)        | 0.90    |

25  
26  
27  
28  
29  
30  
31  
32  
33  
34  
35 \* Adjusted for sex and age, + Fear-Avoidance Beliefs Questionnaire-in relation to Work

36 8 We repeated the analysis with other exposure levels (standing/walking > 6 hours/day, lifting a total  
37  
38 9 of >1000 kg/day and lifting over 20kgs > 15 times/day) but this did not change the results.  
39  
40

41 10 Similar results of no modification effect of JEM variables were found between FABQ-W>20 and  
42  
43 11 sick leave due to LBP, table 4.  
44  
45  
46  
47 12  
48  
49  
50 13  
51  
52  
53 14  
54  
55  
56 15  
57  
58  
59  
60

Sick leave due to low back pain.

Table 4: Modifying effects of specific independent exposures on the association between fear avoidance beliefs and sick leave due to LBP.

|                                       | Interaction OR* (95%CI) | P-value |
|---------------------------------------|-------------------------|---------|
| <b>Physical demanding workloads</b>   |                         |         |
| Standing/walking > 5.44 hours/day     | 0.77 (0.25-2.40)        | 0.65    |
| Standing/walking > 6 hours/day        | 1.16 (0.30-5.29)        | 0.83    |
| Lifting >650 kg/day                   | 0.88 (0.29-2.69)        | 0.83    |
| Lifting >1000 kg/day                  | 1.11 (0.34-3.82)        | 0.87    |
| Number of heavy lifts > 7.7 times/day | 1.04 (0.34-3.16)        | 0.95    |
| Number of heavy lifts > 15 times/day  | 1.38 (0.30-6.70)        | 0.68    |

\* Adjusted for sex and age,

There was a relatively poor correlation between self-reported physical demand and high fear avoidance beliefs (FABQ-W>20) ( $r= 0.29$ ,  $P<0.0001$ ). No correlation was found between self-reported physical demand and total kg lifted ( $r= -0.05$ ,  $P=0.345$ ), standing/walking time ( $r= 0.07$ ,  $P=0.254$ ) or lifting loads over 20kg ( $r= -0.05$ ,  $P=0.349$ ).

## DISCUSSION

### Key results

In this study, self-reported high physical demand at work and high FAB were associated with sick leave due to LBP. Standing/walking time and total number of kg lifted in one day had no association with sick leave due to LBP, whereas lifting over 20 kg several times a day may be associated. To some surprise, independent expert exposure assessments of workload did not modify the found association between self-reported high physical demand at work/ high FAB and sick leave.

Our results confirmed the hypothesis that sick leave due to LBP were associated with self-reported very physically demanding work and high FAB and to a lesser degree with “objective” intensity of specific types of physical workloads. The poor correlation between JEM variables and self-reported physical demand supports this conclusion.

### Limitations

Sick leave due to low back pain.

1  
2  
3  
4 1 The study is based on cross-sectional baseline data from a randomized controlled trial with the aim  
5  
6 2 of retaining participants with physically demanding work and LBP in their job. This limits our  
7  
8 3 ability to investigate causality. The trial included only participants with self-reported physically  
9  
10 4 demanding or very demanding work and concern about their ability to maintain their current job.  
11  
12 5 The resulting FAB score and self-reported physical demands may consequently have been inflated  
13  
14 6 and can result in a lacking contrast among the participants and therefore between the groups. An  
15  
16 7 association was found, and the estimate is probably conservative. Furthermore, use of JEMs entails  
17  
18 8 risk of misclassification of exposure,[23] as people with the same job title may have different  
19  
20 9 exposure to physical workloads and using expert assessment of exposures at the occupational level  
21  
22 10 may therefore miss potentially large individual differences and peak exposures. This can also lead  
23  
24 11 to conservative estimates of associations. Another limitation is the dichotomizing of the JEM based  
25  
26 12 physical workload exposures and of the FABQ-W. No gold standard exists regarding cut-off values  
27  
28 13 for either. Several different methods have been proposed and used, and none have been  
29  
30 14 validated.[8] We used FABQ-W score at 20 or less for low FAB as proposed by others[8,21] and  
31  
32 15 medians for JEM based physical workload exposures. This may also increase the risk of  
33  
34 16 misclassification and therefore underestimate differences between groups. Self-reported sick leave  
35  
36 17 is sensitive to recall bias. However, a meta-analysis has found reasonable rank order convergence  
37  
38 18 with record-based data[24], for which reason we trust in the outcome data. This study includes a  
39  
40 19 selected group of participants with physically demanding work. We did not adjust for  
41  
42 20 socioeconomic status due to risk for over-adjusting since workers with lower socioeconomic status  
43  
44 21 tend to have more physically demanding work.[25] Sample size might explain the wide confidence  
45  
46 22 intervals on all modifications by JEM, but since all odds-ratios are close to 1, it is hardly a question  
47  
48 23 of lack of strength in the data. Neither was there a problem with data contrast in exposure variables  
49  
50 24 of the JEM.  
51  
52  
53  
54  
55  
56  
57  
58  
59  
60



Sick leave due to low back pain.

1  
2  
3  
4 1 Self-reported workload exposures are often used as exposure variable, although it may have a  
5  
6 2 validity problem, as individuals with musculoskeletal complaints tend to overestimate their  
7  
8 3 exposures.[14] In this study, we have overcome this problem by using a job exposure matrix in  
9  
10 4 combination with perceived self-reported physical demand.  
11  
12  
13

## 14 5 **Interpretation**

16  
17 6 The low correlation between self-reported physical demand and JEM variables and no modifying  
18  
19 7 effect of JEM variables indicates that self-reported physical demand might be a more independent  
20  
21 8 risk factor than expected. This may be an expression of the participants assessment of their own  
22  
23 9 physical work capacity with LBP or another work-related factor that we have not investigated. Due  
24  
25 10 to the exclusion of participants with low self-reported physical demand we were unable to explore  
26  
27 11 this further.  
28  
29  
30  
31

32 12 The Lower Body JEM have recently been used on a large general working population and found a  
33  
34 13 exposure-response relation between ton- lifting- and kneeling years and all-cause long term sick  
35  
36 14 leave.[26] The contrast with our results may be due to different definitions of exposure (medians vs  
37  
38 15 ton-/lifting-years), older but healthier population and long term versus relatively short-term sick  
39  
40 16 leave.  
41  
42  
43

44 17 Participants with different duration of LBP have different prognostic outcome. It has been shown  
45  
46 18 that FAB is associated with poor prognosis in LBP of any duration, but most strongly with subacute  
47  
48 19 LBP.[8,27] Our results confirms the association between high FAB and sick leave although many  
49  
50 20 of our participants in addition to a subacute period of LBP also had a longer history of LBP.  
51  
52  
53

54 21 Self-reported physical workloads and sick leave have been found to be associated.[11–13] Recently,  
55  
56 22 5076 employed wage earners in Denmark have been investigated and self-assessed life-long hard  
57  
58 23 physical work and in particular lifting/carrying tasks was found to be associated with all-cause long-  
59  
60

1  
2  
3  
4  
5  
6  
7  
8  
9  
10  
11  
12  
13  
14  
15  
16  
17  
18  
19  
20  
21  
22  
23  
24  
25  
26  
27  
28  
29  
30  
31  
32  
33  
34  
35  
36  
37  
38  
39  
40  
41  
42  
43  
44  
45  
46  
47  
48  
49  
50  
51  
52  
53  
54  
55  
56  
57  
58  
59  
60

1 term sick leave.[28] Similar results was found in shipyard workers, where borderline significant  
2 association between sick leave due to LBP and self-reported physical work factors was found.[29]  
3 Our results are in line with these findings, although we used other exposure definitions. In contrast,  
4 a longitudinal study with 6 months follow-up among 407 industrial workers used high perceived  
5 physical workload as exposure variable, but found no association with sick leave due to LPB.[30]  
6 This result can however be explained by low number of workers reporting sick leave or having  
7 LBP.

8 In a large review regarding acute LBP and sick leave Steenstra et al found strong evidence for  
9 heavy work, in various definitions, as a predictor for duration of sick leave.[31] A later review by  
10 the same author regarding patients with subacute and chronic LBP, a population more similar to  
11 ours, concluded insufficient to moderate evidence for an association with physical demands at  
12 work.[25]

13 In a longitudinal study with video-documented physical exposures lifting, trunk flexion and rotation  
14 increased the risk of sick leave due to LBP.[32] In our study, we did not use objective  
15 measurements but instead a JEM, which may explain the difference between the results because of  
16 the risk of misclassification of exposure by using JEM. This illustrates the importance of further  
17 large studies with objective measures of physical workload and prospective designs.

## 18 CONCLUSION

19 Our study suggests that self-reported high physical demand at work and high fear avoidance are  
20 associated with sick leave due to LBP in individuals with physically demanding jobs. We found no  
21 association between sick leave due to LBP and high physical workloads, except for number of  
22 heavy lifts measured by JEM. Interestingly, the high physical workloads did not modify the  
23 associations with sick leave in participants who rate their work as very demanding or with high fear

Sick leave due to low back pain.

1  
2  
3  
4 1 avoidance scores. The poor correlation between JEM variables and self-reported physical demand  
5  
6 2 indicates, that occupational interventions to reduce sick leave due to LBP should focus more on  
7  
8 3 those with high self-reported physical demands and high fear avoidance, and less on individuals  
9  
10 4 with the objectively highest physical workload.  
11  
12  
13

## 14 5 **Footnotes**

16  
17 6 **Funding:** This work was supported by the Danish Working Environment Research Fund (grant  
18 7 number 09-2012-09).  
19  
20  
21 8

22  
23 9 **Contributorship statement:** JAP, LK, BBH, LMB, EMF, AIK: Study concept and design. JAP,  
24  
25 10 BBH, LMB, AIK: Data acquisition. JAP, BBH, EMF: Statistical analysis. JAP, LK, BBH, LMB,  
26  
27 11 EMF, MB, PH, HB, AIK: Analysis and interpretation of data and critical revision and approval of  
28  
29 12 the final manuscript. JAP: Drafting of the manuscript. All authors reviewed drafts and approved the  
30  
31 13 final manuscript.  
32  
33  
34

35 14 **Data sharing statement:** Research records and data collection are obtained according to the Danish  
36  
37 15 Personal Data Act (DPA) guidelines and any extra data is available upon request under the terms of  
38  
39 16 DPA and European GDPR. The authors affirm that this manuscript is an honest, accurate, and  
40  
41 17 transparent account of the study being reported; that no important aspects of the study have been  
42  
43 18 omitted; and that any discrepancies from the study as planned have been explained. Full dataset to  
44  
45 19 replicate the main analysis is available from the corresponding author on reasonable request  
46  
47  
48  
49

50 20 **Competing interests:** there are no competing interests for any author.  
51  
52

53 21 Figure legend: Figure 1: Flow chart for the actual study in the GoBack trial.  
54  
55  
56 22  
57  
58  
59  
60

1  
2  
3  
4  
5  
6  
7  
8  
9  
10  
11  
12  
13  
14  
15  
16  
17  
18  
19  
20  
21  
22  
23  
24  
25  
26  
27  
28  
29  
30  
31  
32  
33  
34  
35  
36  
37  
38  
39  
40  
41  
42  
43  
44  
45  
46  
47  
48  
49  
50  
51  
52  
53  
54  
55  
56  
57  
58  
59  
60

1

2

3

4 1

Hoy D, Brooks P, Blyth F, *et al.* The Epidemiology of low back pain. *Best Pract Res Clin Rheumatol* 2010;**24**:769–81. doi:10.1016/j.berh.2010.10.002

5

6 2

Murray CJL, Barber RM, Foreman KJ, *et al.* Global, regional, and national disability-adjusted life years (DALYs) for 306 diseases and injuries and healthy life expectancy (HALE) for 188 countries, 1990-2013: Quantifying the epidemiological transition. *Lancet* 2015;**386**:2145–91. doi:10.1016/S0140-6736(15)61340-X

9

10 3

Flachs EM, Eriksen L, Koch MB., *et al.* Sygdomsbyrden i Danmark – sygdomme. Copenhagen: 2015.

11 4

Balagué F, Mannion AF, Pellisé F, *et al.* Non-specific low back pain. *Lancet* 2012;**379**:482–91.

12

doi:10.1016/S0140-6736(11)60610-7

13 5

Demoulin C, Marty M, Genevay S, *et al.* Effectiveness of preventive back educational interventions for low back pain: A critical review of randomized controlled clinical trials. *Eur Spine J* 2012;**21**:2520–30. doi:10.1007/s00586-012-2445-2

15

16 6

Maher CG. A systematic review of workplace interventions to prevent low back pain. *J Osteopath Med* 2001;**4**:32. doi:10.1016/S1443-8461(01)80046-0

17

18 7

Hilfiker R, Bachmann LM, Heitz CAM, *et al.* Value of predictive instruments to determine persisting restriction of function in patients with subacute non-specific low back pain. Systematic review. *Eur Spine J* 2007;**16**:1755–75. doi:10.1007/s00586-007-0433-8

20

21 8

Wertli MM, Rasmussen-Barr E, Weiser S, *et al.* The role of fear avoidance beliefs as a prognostic

Sick leave due to low back pain.

- 1  
2  
3  
4 1 factor for outcome in patients with nonspecific low back pain: A systematic review. *Spine J*  
5  
6 2014;**14**:816–36. doi:10.1016/j.spinee.2013.09.036  
7  
8  
9  
10 3 9 Jensen JN, Karpatschof B, Labriola M, *et al.* Do fear-avoidance beliefs play a role on the association  
11  
12 4 between low back pain and sickness absence? A prospective cohort study among female health care  
13  
14 5 workers. *J Occup Environ Med* 2010;**52**:85–90. doi:10.1097/JOM.0b013e3181c95b9e  
15  
16  
17 6 10 Fritz JM, George SZ, Delitto A. The role of fear-avoidance beliefs in acute low back pain:  
18  
19 7 Relationships with current and future disability and work status. *Pain* 2001;**94**:7–15.  
20  
21 8 doi:10.1016/S0304-3959(01)00333-5  
22  
23  
24  
25 9 11 Andersen LL, Fallentin N, Thorsen SV, *et al.* Physical workload and risk of long-term sickness absence  
26  
27 10 in the general working population and among blue-collar workers: prospective cohort study with  
28  
29 11 register follow-up. *Occup Environ Med* 2016;**73**:246–53. doi:10.1136/oemed-2015-103314  
30  
31  
32 12 12 Lund T, Labriola M, Christensen KB, *et al.* Physical work environment risk factors for long term  
33  
34 13 sickness absence: prospective findings among a cohort of 5357 employees in Denmark. *Bmj*  
35  
36 2006;**332**:449–52. doi:10.1136/bmj.38731.622975.3A  
37 14  
38  
39  
40 15 13 Sundstrup E, Andersen LL. Hard Physical Work Intensifies the Occupational Consequence of  
41  
42 16 Physician-Diagnosed Back Disorder: Prospective Cohort Study with Register Follow-Up among  
43  
44 17 10,000 Workers. *Int J Rheumatol* 2017;**2017**:1037051. doi:10.1155/2017/1037051  
45  
46  
47 18 14 Balogh I, Ørbæk P, Ohlsson K, *et al.* Self-assessed and directly measured occupational physical  
48  
49 19 activities - Influence of musculoskeletal complaints, age and gender. *Appl Ergon* 2004;**35**:49–56.  
50  
51 20 doi:10.1016/j.apergo.2003.06.001  
52  
53  
54  
55 21 15 Hawkes AP, Wilkins JR. Assessing agreement between two job-exposure matrices. *Scand J Work*  
56  
57 22 *Environ Health* 1997;**23**:140–8. <http://www.ncbi.nlm.nih.gov/pubmed/9167237>  
58  
59  
60

1  
2  
3  
4  
5  
6  
7  
8  
9  
10  
11  
12  
13  
14  
15  
16  
17  
18  
19  
20  
21  
22  
23  
24  
25  
26  
27  
28  
29  
30  
31  
32  
33  
34  
35  
36  
37  
38  
39  
40  
41  
42  
43  
44  
45  
46  
47  
48  
49  
50  
51  
52  
53  
54  
55  
56  
57  
58  
59  
60

- 1 16 Rubak TS, Svendsen SW, Andersen JH, *et al.* An expert-based job exposure matrix for large scale  
2  
3  
4 epidemiologic studies of primary hip and knee osteoarthritis: The Lower Body JEM. *BMC*  
5  
6  
7  
8  
9  
10  
11  
12 4 17 Hansen BB, Kirkeskov L, Christensen R, *et al.* Retention in physically demanding jobs of individuals  
13  
14 with low back pain: study protocol for a randomised controlled trial. *Trials* 2015;**16**:166.  
15  
16  
17  
18  
19  
20 7 18 Elm E Von, Altman DG, Egger M, *et al.* guidelines for reporting observational studies Strengthening  
21  
22 the reporting of observational studies in epidemiology ( STROBE ) statement : guidelines for  
23  
24 9 reporting observational studies. *Br Med J* 2007;**335**:19–22. doi:10.1136/bmj.39335.541782.AD  
25  
26  
27 10 19 Gudbergesen H, Bartels EM, Krusager P, *et al.* Test-retest of computerized health status  
28  
29  
30  
31  
32  
33  
34  
35 13 20 Waddell G, Newton M, Henderson I, *et al.* A Fear-Avoidance Beliefs Questionnaire (FABQ) and the  
36  
37 14 role of fear-avoidance beliefs in chronic low back pain and disability. *Pain* 1993;**52**:157–68.  
38  
39 15  
40  
41  
42 16 21 George SZ, Fritz JM, Childs JD. Investigation of elevated fear-avoidance beliefs for patients with low  
43  
44  
45  
46  
47 18  
48  
49  
50 19 22 Statistics Denmark. Danish ISCO-88 classification.  
51  
52 20  
53  
54  
55 21 23 Kauppinen T, Uuskulainen S, Saalo A, *et al.* Use of the finnish information system on occupational  
56  
57 22 exposure (FINJEM) in epidemiologic, surveillance, and other applications. *Ann Occup Hyg*

Sick leave due to low back pain.

- 1  
2  
3  
4 1 2014;**58**:380–96. doi:10.1093/annhyg/met074  
5  
6  
7 2 24 Johns G, Miraglia M. The reliability, validity, and accuracy of self-reported absenteeism from work: a  
8  
9  
10 3 meta-analysis. *J Occup Health Psychol* 2015;**20**:1–14. doi:10.1037/a0037754  
11  
12  
13 4 25 Steenstra IA, Munhall C, Irvin E, *et al*. Systematic Review of Prognostic Factors for Return to Work in  
14  
15 5 Workers with Sub Acute and Chronic Low Back Pain. *J Occup Rehabil* Published Online First: 19  
16  
17 6 September 2016. doi:10.1007/s10926-016-9666-x  
18  
19  
20 7 26 Sundstrup E, Hansen ÅM, Mortensen EL, *et al*. Cumulative occupational mechanical exposures  
21  
22 8 during working life and risk of sickness absence and disability pension: Prospective cohort study.  
23  
24 9  
25 9 *Scand J Work Environ Heal* 2017;**43**:415–25. doi:10.5271/sjweh.3663  
26  
27  
28 10 27 Wertli MM, Rasmussen-Barr E, Held U, *et al*. Fear-avoidance beliefs—a moderator of treatment  
29  
30 11 efficacy in patients with low back pain: a systematic review. *Spine J* 2014;**14**:2658–78.  
31  
32 12 doi:10.1016/j.spinee.2014.02.033  
33  
34  
35 13 28 Sundstrup E, Hansen ÅM, Mortensen EL, *et al*. Retrospectively assessed physical work environment  
36  
37 14 during working life and risk of sickness absence and labour market exit among older workers. *Occup*  
38  
39 15  
40 15 *Environ Med* 2017;;oemed-2016-104279. doi:10.1136/oemed-2016-104279  
41  
42  
43 16 29 Alexopoulos EC, Konstantinou EC, Bakoyannis G, *et al*. Risk factors for sickness absence due to low  
44  
45 17 back pain and prognostic factors for return to work in a cohort of shipyard workers. *Eur Spine J*  
46  
47 18 2008;**17**:1185–92. doi:10.1007/s00586-008-0711-0  
48  
49  
50 19 30 IJzelenberg W, Burdorf a. Risk factors for musculoskeletal symptoms and ensuing health care use  
51  
52 20 and sick leave. *Spine (Phila Pa 1976)* 2005;**30**:1550–6. doi:10.1097/01.brs.0000167533.83154.28  
53  
54  
55 21 31 Steenstra IA, Verbeek JH, Heymans MW, *et al*. Prognostic factors for duration of sick leave in  
56  
57 22 patients sick listed with acute low back pain: a systematic review of the literature. *Occup Environ*  
58  
59  
60

Sick leave due to low back pain.

1  
2  
3  
4  
5  
6  
7  
8  
9  
10  
11  
12  
13  
14  
15  
16  
17  
18  
19  
20  
21  
22  
23  
24  
25  
26  
27  
28  
29  
30  
31  
32  
33  
34  
35  
36  
37  
38  
39  
40  
41  
42  
43  
44  
45  
46  
47  
48  
49  
50  
51  
52  
53  
54  
55  
56  
57  
58  
59  
60

1            *Med* 2005;**62**:851–60. doi:10.1136/oem.2004.015842

2            32        Hoogendoorn WE, Bongers PM, de Vet HCW, *et al*. High physical work load and low job satisfaction

3            increase the risk of sickness absence due to low back pain: results of a prospective cohort study.

4            *Occup Environ Med* 2002;**59**:323–8.<http://www.ncbi.nlm.nih.gov/pubmed/11983847>

5

For peer review only



1  
2  
3  
4  
5  
6  
7  
8  
9  
10  
11  
12  
13  
14  
15  
16  
17  
18  
19  
20  
21  
22  
23  
24  
25  
26  
27  
28  
29  
30  
31  
32  
33  
34  
35  
36  
37  
38  
39  
40  
41  
42  
43  
44  
45  
46  
47  
48  
49  
50  
51  
52  
53  
54  
55  
56  
57  
58  
59  
60



338x190mm (300 x 300 DPI)

STROBE Statement—Checklist of items that should be included in reports of *cross-sectional studies*

|                              | Item No | Recommendation                                                                                                                                                                                               | Page No  |
|------------------------------|---------|--------------------------------------------------------------------------------------------------------------------------------------------------------------------------------------------------------------|----------|
| <b>Title and abstract</b>    | 1       | (a) Indicate the study's design with a commonly used term in the title or the abstract                                                                                                                       | 1        |
|                              |         | (b) Provide in the abstract an informative and balanced summary of what was done and what was found                                                                                                          | 2        |
| <b>Introduction</b>          |         |                                                                                                                                                                                                              |          |
| Background/rationale         | 2       | Explain the scientific background and rationale for the investigation being reported                                                                                                                         | 4        |
| Objectives                   | 3       | State specific objectives, including any prespecified hypotheses                                                                                                                                             | 5        |
| <b>Methods</b>               |         |                                                                                                                                                                                                              |          |
| Study design                 | 4       | Present key elements of study design early in the paper                                                                                                                                                      | 5        |
| Setting                      | 5       | Describe the setting, locations, and relevant dates, including periods of recruitment, exposure, follow-up, and data collection                                                                              | 5-6      |
| Participants                 | 6       | (a) Give the eligibility criteria, and the sources and methods of selection of participants                                                                                                                  | 5-6      |
| Variables                    | 7       | Clearly define all outcomes, exposures, predictors, potential confounders, and effect modifiers. Give diagnostic criteria, if applicable                                                                     | 6-7      |
| Data sources/<br>measurement | 8*      | For each variable of interest, give sources of data and details of methods of assessment (measurement). Describe comparability of assessment methods if there is more than one group                         | 6-7      |
| Bias                         | 9       | Describe any efforts to address potential sources of bias                                                                                                                                                    | 7-8      |
| Study size                   | 10      | Explain how the study size was arrived at                                                                                                                                                                    | 8        |
| Quantitative variables       | 11      | Explain how quantitative variables were handled in the analyses. If applicable, describe which groupings were chosen and why                                                                                 | 7-8      |
| Statistical methods          | 12      | (a) Describe all statistical methods, including those used to control for confounding                                                                                                                        | 7-8      |
|                              |         | (b) Describe any methods used to examine subgroups and interactions                                                                                                                                          | 7-8      |
|                              |         | (c) Explain how missing data were addressed                                                                                                                                                                  | 7-8      |
|                              |         | (d) If applicable, describe analytical methods taking account of sampling strategy                                                                                                                           | 7-8      |
|                              |         | (e) Describe any sensitivity analyses                                                                                                                                                                        |          |
| <b>Results</b>               |         |                                                                                                                                                                                                              |          |
| Participants                 | 13*     | (a) Report numbers of individuals at each stage of study—eg numbers potentially eligible, examined for eligibility, confirmed eligible, included in the study, completing follow-up, and analysed            | 8        |
|                              |         | (b) Give reasons for non-participation at each stage                                                                                                                                                         | 8        |
|                              |         | (c) Consider use of a flow diagram                                                                                                                                                                           | Figure 1 |
| Descriptive data             | 14*     | (a) Give characteristics of study participants (eg demographic, clinical, social) and information on exposures and potential confounders                                                                     | 9        |
|                              |         | (b) Indicate number of participants with missing data for each variable of interest                                                                                                                          | 9        |
| Outcome data                 | 15*     | Report numbers of outcome events or summary measures                                                                                                                                                         | 9        |
| Main results                 | 16      | (a) Give unadjusted estimates and, if applicable, confounder-adjusted estimates and their precision (eg, 95% confidence interval). Make clear which confounders were adjusted for and why they were included | 9        |

|                          |    |                                                                                                                                                                            |        |
|--------------------------|----|----------------------------------------------------------------------------------------------------------------------------------------------------------------------------|--------|
|                          |    | (b) Report category boundaries when continuous variables were categorized                                                                                                  | tables |
|                          |    | (c) If relevant, consider translating estimates of relative risk into absolute risk for a meaningful time period                                                           |        |
| Other analyses           | 17 | Report other analyses done—eg analyses of subgroups and interactions, and sensitivity analyses                                                                             | 11     |
| <b>Discussion</b>        |    |                                                                                                                                                                            |        |
| Key results              | 18 | Summarise key results with reference to study objectives                                                                                                                   | 12     |
| Limitations              | 19 | Discuss limitations of the study, taking into account sources of potential bias or imprecision. Discuss both direction and magnitude of any potential bias                 | 13     |
| Interpretation           | 20 | Give a cautious overall interpretation of results considering objectives, limitations, multiplicity of analyses, results from similar studies, and other relevant evidence | 14     |
| Generalisability         | 21 | Discuss the generalisability (external validity) of the study results                                                                                                      | 14     |
| <b>Other information</b> |    |                                                                                                                                                                            |        |
| Funding                  | 22 | Give the source of funding and the role of the funders for the present study and, if applicable, for the original study on which the present article is based              | 16     |

\*Give information separately for exposed and unexposed groups.

**Note:** An Explanation and Elaboration article discusses each checklist item and gives methodological background and published examples of transparent reporting. The STROBE checklist is best used in conjunction with this article (freely available on the Web sites of PLoS Medicine at <http://www.plosmedicine.org/>, Annals of Internal Medicine at <http://www.annals.org/>, and Epidemiology at <http://www.epidem.com/>). Information on the STROBE Initiative is available at [www.strobe-statement.org](http://www.strobe-statement.org).

# BMJ Open

## Physical demand at work and sick leave due to low back pain - a cross sectional study

|                                 |                                                                                                                                                                                                                                                                                                                                                                                                                                                                                                                                                                                                                                                                                                                                                                                                                                                                                                                                                                                                                                                                                                                                                                                                                                                                                        |
|---------------------------------|----------------------------------------------------------------------------------------------------------------------------------------------------------------------------------------------------------------------------------------------------------------------------------------------------------------------------------------------------------------------------------------------------------------------------------------------------------------------------------------------------------------------------------------------------------------------------------------------------------------------------------------------------------------------------------------------------------------------------------------------------------------------------------------------------------------------------------------------------------------------------------------------------------------------------------------------------------------------------------------------------------------------------------------------------------------------------------------------------------------------------------------------------------------------------------------------------------------------------------------------------------------------------------------|
| Journal:                        | <i>BMJ Open</i>                                                                                                                                                                                                                                                                                                                                                                                                                                                                                                                                                                                                                                                                                                                                                                                                                                                                                                                                                                                                                                                                                                                                                                                                                                                                        |
| Manuscript ID                   | bmjopen-2018-026917.R2                                                                                                                                                                                                                                                                                                                                                                                                                                                                                                                                                                                                                                                                                                                                                                                                                                                                                                                                                                                                                                                                                                                                                                                                                                                                 |
| Article Type:                   | Research                                                                                                                                                                                                                                                                                                                                                                                                                                                                                                                                                                                                                                                                                                                                                                                                                                                                                                                                                                                                                                                                                                                                                                                                                                                                               |
| Date Submitted by the Author:   | 06-Mar-2019                                                                                                                                                                                                                                                                                                                                                                                                                                                                                                                                                                                                                                                                                                                                                                                                                                                                                                                                                                                                                                                                                                                                                                                                                                                                            |
| Complete List of Authors:       | <p>Aavang Petersen, Jonathan; Copenhagen University Hospital Bispebjerg and Frederiksberg, Department of Occupational and Environmental Medicine</p> <p>Kirkeskov, Lilli; Copenhagen University Hospital Bispebjerg and Frederiksberg, Department of Occupational and Environmental Medicine, Unit of Social Medicine</p> <p>Hansen, Bjarke; Copenhagen University Hospital, Bispebjerg and Frederiksberg Hospital, The Parker Institute, Department of Rheumatology</p> <p>Begtrup, Luise; Copenhagen University Hospital Bispebjerg and Frederiksberg, Department of Occupational and Environmental Medicine</p> <p>Flachs, Esben; Copenhagen University Hospital Bispebjerg and Frederiksberg, Department of Occupational and Environmental Medicine</p> <p>Boesen, Mikael; Copenhagen University Hospital, Bispebjerg and Frederiksberg Hospital, Department of Radiology</p> <p>Hansen, Philip; Copenhagen University Hospital, Bispebjerg and Frederiksberg, Department of Radiology</p> <p>Bliddal, Henning; Copenhagen University Hospital, Bispebjerg and Frederiksberg Hospital, The Parker Institute, Department of Rheumatology</p> <p>Kryger, Ann; Copenhagen University Hospital Bispebjerg and Frederiksberg, Department of Occupational and Environmental Medicine</p> |
| <b>Primary Subject Heading</b>: | Occupational and environmental medicine                                                                                                                                                                                                                                                                                                                                                                                                                                                                                                                                                                                                                                                                                                                                                                                                                                                                                                                                                                                                                                                                                                                                                                                                                                                |
| Secondary Subject Heading:      | Rheumatology                                                                                                                                                                                                                                                                                                                                                                                                                                                                                                                                                                                                                                                                                                                                                                                                                                                                                                                                                                                                                                                                                                                                                                                                                                                                           |
| Keywords:                       | OCCUPATIONAL & INDUSTRIAL MEDICINE, PREVENTIVE MEDICINE, REHABILITATION MEDICINE, RHEUMATOLOGY                                                                                                                                                                                                                                                                                                                                                                                                                                                                                                                                                                                                                                                                                                                                                                                                                                                                                                                                                                                                                                                                                                                                                                                         |
|                                 |                                                                                                                                                                                                                                                                                                                                                                                                                                                                                                                                                                                                                                                                                                                                                                                                                                                                                                                                                                                                                                                                                                                                                                                                                                                                                        |

SCHOLARONE™  
Manuscripts

1  
2  
3  
4 1 Physical demand at work and sick leave due to low back pain - a cross sectional study

5  
6  
7  
8 2 Jonathan Aavang Petersen, MD†, Lilli Kirkeskov, PhD†, Bjarke Brandt Hansen, PhD\*, Luise

9  
10 3 Moelenberg Begtrup, PhD†, Esben Meulengracht Flachs, PhD†, Mikael Boesen, PhD#, Philip

11  
12 4 Hansen, PhD#, Henning Bliddal, DMSc\* and Ann Isabel Kryger, PhD†

13  
14  
15 5 † Department of Occupational and Environmental Medicine, Copenhagen University Hospital,

16  
17 6 Bispebjerg and Frederiksberg, Denmark. \*The Parker Institute, Department of Rheumatology,

18  
19 7 Copenhagen University Hospital, Bispebjerg and Frederiksberg Hospital, Copenhagen, Denmark.

20  
21 8 #Department of Radiology, Copenhagen University Hospital, Bispebjerg and Frederiksberg

22  
23 9 Hospital

24  
25  
26  
27  
28 10 **Corresponding author details and contacts:**

29  
30 11 Jonathan Aavang Petersen, MD

31  
32  
33 12 Department of Occupational and Environmental Medicine, Copenhagen University Hospital

34  
35 13 Bispebjerg and Frederiksberg, Bispebjerg Bakke 23, DK-2400 Copenhagen NV

36  
37  
38 14 E-mail: jonathanaavang@hotmail.com

39  
40  
41 15

42  
43  
44 16

45  
46  
47 17

48  
49  
50 18

51  
52  
53 19

54  
55  
56 20

Sick leave due to low back pain.

1  
2  
3  
4 **1 Abstract**

5  
6  
7 **2 Objectives:** To investigate if self-reported high physical demand at work, objective physical  
8 workload using a job exposure matrix (JEM) and fear-avoidance beliefs are associated with  
9 3 reported sick leave in the previous year in persons with low back pain (LBP). Secondly, to  
10 4 investigate if the effects of fear-avoidance and self-reported high physical demand at work on sick  
11 5 leave are modified by the objective physical workloads.  
12 6

13  
14  
15  
16 7 **Settings:** Participants were recruited from general practice and by advertisement in a local  
17 8 newspaper.  
18 9

19  
20  
21 9 **Participants:** 305 participants with a current period of 2 to 4 weeks LBP and self-reported  
22 10 difficulty in maintaining physically demanding jobs due to LBP were interviewed, clinically  
23 11 examined and had an MRI at baseline.  
24 12

25  
26  
27 12 **Main outcome measures:** Independent variables were high fear-avoidance, self-reported high  
28 13 physical demand at work and objective measures of physical workloads (JEM). Outcome was self-  
29 14 reported sick leave due to LBP in the previous year. Logistic regression and tests for interaction  
30 15 were used to identify risk factors and modifiers for the association with self-reported sick leave.  
31 16

32  
33  
34 16 **Results:** Self-reported physically demanding work and high fear-avoidance were significantly  
35 17 associated with prior sick leave due to LBP in the previous year with OR 1.75 95%CI (1.10-2.75)  
36 18 and 2.75 95%CI (1.61-4.84) respectively. No objective physical workloads had significant  
37 19 associations. There was no modifying effect of objective physical workloads on the association  
38 20 between self-reported physical demand at work/ high fear-avoidance and sick leave.  
39 21

40  
41  
42  
43 21 **Conclusions:** Occupational interventions to reduce sick leave due to LBP may have to focus more  
44 22 on those with high self-reported physical demands and high fear-avoidance, and less on individuals  
45 23 with the objectively highest physical workload.  
46 24

47  
48  
49  
50 24 **Trial registration:** The GoBack trial was registered with ClinicalTrials.gov (identifier:  
51 25 NCT02015572) on 29 November 2013  
52 26

53  
54  
55  
56  
57 27  
58  
59  
60

1  
2  
3  
4  
5  
6  
7  
8  
9  
10  
11  
12  
13  
14  
15  
16  
17  
18  
19  
20  
21  
22  
23  
24  
25  
26  
27  
28  
29  
30  
31  
32  
33  
34  
35  
36  
37  
38  
39  
40  
41  
42  
43  
44  
45  
46  
47  
48  
49  
50  
51  
52  
53  
54  
55  
56  
57  
58  
59  
60

1

## 2 **Strength and limitations of this study.**

- 3 • By using fear-avoidance score and self-reported workload together with a job exposure
- 4 matrix in the investigation of an association with sick leave, the validity problem with self-
- 5 reported exposures has been reduced
- 6 • The study population consisted of workers with low back pain and a physically demanding
- 7 work, which is a clinically relevant sample of participants.
- 8 • Workers with low back pain but no self-reported physically demanding work were not
- 9 included in the study with risk of lacking contrast among the included participants and thus
- 10 risk of underestimation of associations.
- 11 • Use of job exposure matrices and dichotomizing of the exposure data without a gold
- 12 standard regarding cut-off values entails risk of misclassification of exposure.

Sick leave due to low back pain.

## 1 INTRODUCTION

### 2 Background

3 Low back pain (LBP) is a common musculoskeletal disorder and is one of the leading causes of  
4 disability for the working population. [1,2] In Denmark, back pain is estimated to accumulate 4.8  
5 billion DKr in annual loss of productivity.[3]

6 The development of LBP is believed to be caused by a complex combination of both mechanical  
7 and physiological factors, and psychological, social and cultural factors.[4] Systematic reviews have  
8 concluded that no single intervention is likely to be effective in preventing LBP, due to its  
9 multidimensional nature.[5–7]

10 Psychological factors such as high fear-avoidance beliefs (FAB) have proven to be an important  
11 prognostic factor for poor outcome in patients with nonspecific LBP[8] and, as such, have a  
12 predictive effect on sick leave. [9,10] FAB are believed to influence the perception of pain resulting  
13 in catastrophizing, fear and avoidance of physical activities. This leads to a vicious cycle of fear-  
14 avoidance behaviour, physical deterioration and social isolation – factors which may affect the  
15 ability to stay in a job.[10]

16 Self-reported workload exposures have been associated with LBP in the majority of studies [11–13]  
17 despite the fact, that self-reported workload exposures may entail a validity problem as individuals  
18 with musculoskeletal complaints tend to overestimate their exposures.[14], A job exposure matrix  
19 (JEM) is a classification system linking occupation and industry titles with job-related  
20 exposures.[15] This could be more accurate in estimating the real exposure of physical demands by  
21 reducing misclassification of exposure. However, we do not know if a JEM is better at predicting  
22 risk of sick leave. JEMs have been shown to be independent and valid measurements of physical



1  
2  
3  
4 1 demands in patients with primary hip and knee osteoarthritis [16], may be useful in the assessment  
5  
6 2 of exposure for LBP patients, and be associated with sick leave.  
7  
8

### 9 3 **Objective**

10  
11  
12 4 The objective of the study was 1) to investigate to what degree self-reported high physical demand  
13  
14 5 at work, physical workload using the job exposure matrix and fear avoidance beliefs are associated  
15  
16 6 with reported sick leave in the previous year in a group of persons with low back pain, and 2) if the  
17  
18 7 association between fear-avoidance or self-reported high physical demand at work and reported sick  
19  
20 8 leave is modified by the objective measures of physical workloads.  
21  
22  
23

## 24 9 **METHODS**

### 25 10 **Design and Ethics**

26  
27  
28 11 The study was based on cross-sectional baseline data from a randomized controlled trial (the  
29  
30 12 GoBack trial, NCT02015572), [17] and reported in accordance with the Strengthening the  
31  
32 13 Reporting of Observational Studies in Epidemiology guidelines – the STROBE.[18] All participants  
33  
34 14 gave written informed consent before enrolment, and the study was approved by the local ethics  
35  
36 15 committee (H-3-2013-161) and the Danish Data Protection Agency ((DPA approval number 2014-  
37  
38 16 41-2673).  
39  
40  
41  
42  
43  
44  
45

### 46 18 **Participants and setting**

47  
48 19 Participants between 18 and 65 years of age with a current episode of 2 to 4 weeks of LBP and a  
49  
50 20 self-reported physically demanding job were recruited from general practice, the outpatient clinic of  
51  
52 21 the Department of Rheumatology, Frederiksberg Hospital, Denmark and by advertisement in a local  
53  
54 22 newspaper. Potential participants were interviewed by telephone and screened for inclusion.  
55  
56 23 Participants responded to “How physically demanding is your current job?” Response categories  
57  
58  
59  
60

Sick leave due to low back pain.

1  
2  
3  
4 1 were: “Very demanding, demanding, not very demanding, not at all demanding.” Only those  
5  
6 2 responding demanding or very demanding were included. Furthermore, the participants needed to  
7  
8 3 express concern about the ability to maintain their current job (yes/no) and they had to have current  
9  
10 4 employment for at least 30 hours/week. Individuals with pregnancy, severe somatic or psychiatric  
11  
12 5 disease, cancer or metastatic disease, severe co-morbidity, treatment from or referral to outside  
13  
14 6 providers (for example surgery) or contraindications for having a conventional MRI were not  
15  
16 7 included.  
17  
18  
19  
20

## 21 8 **Variables**

22  
23  
24 9 At the first visit (baseline) participants filled in a battery of questionnaires on a validated touch  
25  
26 10 screen[19], underwent a physical examination and an MRI. The questionnaires investigated  
27  
28 11 demographic information, comorbidity, job-category, previous history of LBP, physically  
29  
30 12 demanding work, leisure-time, physical activity, psychosocial work environment, general health  
31  
32 13 status, history of work-related factors, work ability, back-specific disability, fear-avoidance beliefs,  
33  
34 14 pain score and sick leave due to LBP. Diagnosis was based on symptoms, clinical examination and  
35  
36 15 MRI.  
37  
38  
39  
40

41 16 Sick leave due to LBP was recorded by answering the following questions at baseline: “How many  
42  
43 17 days of sick leave have you had due to LBP in the previous year?” Categorized as short (1-7 days),  
44  
45 18 medium (8-30 days), long (31-90 days), very long (over 90 days) or every day. Sick leave due to  
46  
47 19 LBP was then dichotomized as low (1-7 days/year) and high ( $\geq 8$ days/year) due to overall low sick  
48  
49 20 leave among the participants.  
50  
51  
52

53 21 Fear-avoidance beliefs were assessed with the 16-item Fear-Avoidance Beliefs Questionnaire  
54  
55 22 (FABQ).[20] FABQ-W is the sum of seven items (score range 0-42 points) with each item scored  
56  
57  
58  
59  
60

1  
2  
3  
4 1 on a seven-point Likert scale from strongly disagree (0-points) to strongly agree (6-points). We  
5  
6 2 defined high fear-avoidance beliefs as FABQ-W>20 points.[21]  
7  
8  
9  
10 3 Physically demanding work was evaluated both by self-report (having a very demanding or having  
11  
12 4 a demanding current job) and with the use of the Lower Body Job Exposure Matrix (JEM).[16]  
13  
14  
15 5 Job titles from the baseline questionnaires were transformed into an occupational title in the Danish  
16  
17 6 version of the International Standard Classification of Occupations (D-ISCO-88).[22] The JEM  
18  
19 7 consisted of 168 D-ISCO codes which were divided into 121 job groups. Occupational medicine  
20  
21 8 experts assessed physical exposures during a working day and estimated time sitting, time  
22  
23 9 standing/walking, time with whole body vibration, time kneeling, and lifting (cumulated weight and  
24  
25 10 number of heavy lifts>20 kg) in different jobs. The JEM did not include all job titles. Therefore, we  
26  
27 11 matched missing job titles to a similar existing job title and exposure in the JEM. This was done by  
28  
29 12 consensus preceded by independent matching by two occupational medicine experts. We  
30  
31 13 dichotomized JEM variables according to median values to maximize strength of data and tested  
32  
33 14 other exposure levels (standing/walking > 6 hours/day, lifting a total of >1000 kg/day and lifting  
34  
35 15 over 20kgs > 15 times/day).

## 41 16 **Statistical methods**

42  
43 17 Descriptive data are reported as point estimates (either frequency or mean and standard deviation  
44  
45 18 [SD]); the correlation between self-reported physical demand at work and FABQ-W>20 was  
46  
47 19 calculated as Spearman's rank correlation. We used a series of multivariate logistic regression  
48  
49 20 models to investigate each measure from the Lower Body JEM separately. The models investigated  
50  
51 21 the association between dichotomized sick leave due to LBP  $\geq$  8 days compared to 1-7 days during  
52  
53 22 the previous year (outcome) and either self-reported physical demand at work, fear-avoidance, or  
54  
55 23 objective workload (JEM), all adjusted for age and sex. Analyses of the modifying effects of  
56  
57  
58  
59  
60

Sick leave due to low back pain.

1  
2  
3  
4 1 specific independent variables on effect of self-reported exposure were performed by adding an  
5  
6 2 interaction term between the objective (JEM) and self-reported exposure (e.g. FABQ-W and self-  
7  
8 reported physically demanding work) to the regression model. Statistical analyses for descriptive  
9 3  
10 4 data were done using SAS version 9.2 (SAS Institute IC, Cary, NC, USA) and regression analyses  
11  
12 5 was done using R® v 3.2.2 (R: A Language and Environment for Statistical Computing, R  
13  
14 6 Foundation for Statistical Computing, Vienna, Austria, 2016, <https://www.R-project.org>). All  
15  
16 7 analyses used a significance level of 0.05.  
17  
18  
19  
20

## 21 8 **Patient and public involvement**

22  
23  
24 9 Patients or the general public were not involved in the design or development of the study.  
25  
26

## 27 10 **RESULTS**

### 28 11 **Participants**

29  
30 12 Based on the telephone interview 274 participants out of 573 interviewed were excluded, mainly  
31  
32 13 due to not having a current episode of LBP or not having a physically demanding job. Of the 326  
33  
34 14 enrolled participants, 305 participants came to the first visit and were included in the study, see  
35  
36 15 Figure 1. A total of 55 job titles (48 among male and 24 among women) were represented and 41  
37  
38 16 participants were reassigned a new job title with similar exposure group due to lacking presence in  
39  
40 17 the JEM (data not shown).  
41  
42  
43  
44  
45

### 46 18 **Descriptive data**

47  
48  
49 19 Participant characteristics are shown in table 1.  
50  
51  
52  
53 20  
54  
55  
56 21  
57  
58  
59 22  
60

Table 1 Characteristics of the participants (N=305)

|                                                      | Total |         | Self-reported physical demand |         |           |          | P-value             |
|------------------------------------------------------|-------|---------|-------------------------------|---------|-----------|----------|---------------------|
|                                                      |       |         | Very demanding                |         | Demanding |          |                     |
|                                                      | Total | (100%)  | Very demanding                | (47.2%) | Demanding | (52.8%)  |                     |
| <b>Age, years, Mean ±SD</b>                          | 45.5  | ± 10.3  | 47.5                          | ±9.8    | 43.3      | ±10.3    | <0.001*             |
| <b>Males, n (%)</b>                                  | 206   | (67.5%) | 96                            | (66.7%) | 110       | (68.3%)  | 0.853 <sup>+</sup>  |
| <b>Current Smoking</b>                               |       |         |                               |         |           |          | 0.004 <sup>+</sup>  |
| Yes, n (%)                                           | 112   | (36.7%) | 63                            | (43.8%) | 49        | (30.43%) |                     |
| No, n (%)                                            | 193   | (63.3%) | 81                            | (56.3%) | 112       | (69.6%)  |                     |
| <b>BMI (kg/m<sup>2</sup>)</b>                        | 26.9  | ± 4.2   | 27.2                          | ±4.1    | 26.7      | ±4.4     | 0.278*              |
| <b>Actual sick leave due to LBP, n (%)</b>           | 34    | (11.2%) | 23                            | (16.0%) | 11        | (6.8%)   | 0.020 <sup>+</sup>  |
| <b>Sick leave due to LBP last year</b>               |       |         |                               |         |           |          | 0.069 <sup>+</sup>  |
| 1-7 days, n (%)                                      | 168   | (55.1%) | 69                            | (47.9%) | 99        | (61.5%)  |                     |
| 8-30 days, n (%)                                     | 104   | (34.1%) | 104                           | (38.9%) | 56        | (29.8%)  |                     |
| 31-90 days, n (%)                                    | 25    | (8.2%)  | 13                            | (9.0%)  | 12        | (7.5%)   |                     |
| >90 days, n (%)                                      | 8     | (2.6%)  | 2                             | (4.2%)  | 6         | (1.2%)   |                     |
| <b>Physical demanding workloads</b>                  |       |         |                               |         |           |          |                     |
| Standing/walking > 5.44 hours/day, n (%)             | 147   | (48.2%) | 69                            | (47.9%) | 78        | (48.5%)  | 0.328 <sup>+</sup>  |
| Lifting >650 kg/day, n (%)                           | 148   | (48.5%) | 77                            | (53.5%) | 71        | (44.1%)  | 0.128 <sup>+</sup>  |
| Number of heavy lifts > 7.7 times/day, n (%)         | 145   | (47.5%) | 75                            | (52.1%) | 70        | (43.5%)  | 0.165 <sup>+</sup>  |
| <b>Clinical symptoms</b>                             |       |         |                               |         |           |          | 0.468 <sup>+</sup>  |
| LBP, n (%)                                           | 170   | (55.7%) | 85                            | (59.0%) | 85        | (52.8%)  |                     |
| LBP and + additional sciatica, n (%)                 | 86    | (28.2%) | 36                            | (25.0%) | 50        | (31.1%)  |                     |
| LBP and + additional radiating pain, n (%)           | 49    | (16.1%) | 23                            | (16.0%) | 26        | (16.2%)  |                     |
| <b>Primary diagnosis<sup>#</sup></b>                 |       |         |                               |         |           |          | 0.498 <sup>+</sup>  |
| Spondylosis, n (%)                                   | 155   | (50.8%) | 68                            | (47.2%) | 87        | (54.0%)  |                     |
| Herniated disc, n (%)                                | 48    | (15.7%) | 23                            | (16.0%) | 25        | (15.5%)  |                     |
| Spondylolisthesis, n (%)                             | 23    | (7.5%)  | 11                            | (7.6%)  | 12        | (7.5%)   |                     |
| Spinal stenosis, n (%)                               | 12    | (3.9%)  | 4                             | (2.8%)  | 8         | (5.0%)   |                     |
| Unspecific LBP, n (%)                                | 46    | (15.1%) | 24                            | (16.7%) | 22        | (13.7%)  |                     |
| Spondyloarthritis, n (%)                             | 13    | (4.3%)  | 9                             | (6.3%)  | 4         | (2.5%)   |                     |
| Other, n (%)                                         | 8     | (2.6%)  | 5                             | (3.5%)  | 3         | (1.9%)   |                     |
| <b>Current job<sup>#</sup></b>                       |       |         |                               |         |           |          | 0.816 <sup>+</sup>  |
| Disco 1, 2: professionals and highly educated, n (%) | 21    | (6.9%)  | 9                             | (6.3%)  | 12        | (7.5%)   |                     |
| Disco 3, 4, 5: office, teaching and nursing, n (%)   | 99    | (33.8%) | 47                            | (32.6%) | 56        | (34.8%)  |                     |
| Disco 6, 7, 8, 9: blue collar, n (%)                 | 181   | (59.3%) | 88                            | (61.1%) | 93        | (57.7%)  |                     |
| <b>Pain intensity (VAS 0-10)</b>                     |       |         |                               |         |           |          |                     |
| Average last 4 weeks, Mean ±SD                       | 5.6   | ± 1.9   | 5.3                           | ±1.9    | 5.99      | ±1.9     | 0.002*              |
| Actual, Mean ±SD                                     | 4.5   | ± 2.1   | 4.3                           | ±2.1    | 4.7       | ±2.0     | 0.105*              |
| Highest intensity last 4 weeks, Mean ±SD             | 7.1   | ± 2.0   | 6.75                          | ±2.0    | 7.5       | ±2.0     | <0.001*             |
| <b>Fear-Avoidance Beliefs</b>                        |       |         |                               |         |           |          | <0.001 <sup>+</sup> |
| Low (0-20), n (%)                                    | 83    | (27.2%) | 23                            | (16.0%) | 60        | (37.3%)  |                     |
| High (21-42), n (%)                                  | 222   | (72.8%) | 121                           | (84.0%) | 101       | (62.7%)  |                     |
| (0-42), Mean ±SD                                     | 25.0  | ± 7.4   | 22.6                          | ±7.03   | 27.8      | ±6.9     | <0.001*             |

±Based on symptoms, clinical examination and MRI. \*t-test, +X<sup>2</sup>-test, # Danish version of the International Standard Classification of Occupations

Values are percentages of participants or mean and SDs.

BMI; body mass index, VAS; visual analog scale, FABQ; Fear-Avoidance Beliefs Questionnaire. LBP; low back pain

## Sick leave due to low back pain.

1  
2  
3  
4 1 Overall there was a low rate of sick leave due to LBP with 89.2% participants having less than one  
5  
6 2 month of sick leave during the last 12 months.

7  
8  
9  
10 3 Participants with a self-reported very physically demanding job had the lowest mean FAB, lowest  
11  
12 4 current and average pain intensity and were more seldom smokers than participants reporting work  
13  
14 5 as physically demanding.

15  
16  
17 6 Participants with a self-reported very physically demanding job were slightly, but significantly  
18  
19 7 older compared to participants who only reported their job as demanding. There were no significant  
20  
21 8 differences regarding sex, BMI, JEM or educational level.

### 9 **Factors associated with sick leave due to LBP**

10 High self-reported physical demand and high fear-avoidance beliefs (FABQ-W>20) were both  
11 significantly associated with sick leave due to LBP  $\geq 8$  days per year with OR 1.75 (95% CI 1.10-  
12 2.75) and 2.75 (95% CI 1.61-4.84), respectively. After adjustment for age and sex, there was still a  
13 strong association, see table 2.

Table 2: Crude and adjusted odds ratio for sick leave due to LBP according to self-rated physical demand, fear-avoidance beliefs and physical demanding workloads, respectively.

|                                          | Unadjusted OR<br>(95%CI) | P-value | Adjusted* OR<br>(95%CI) | P-value |
|------------------------------------------|--------------------------|---------|-------------------------|---------|
| <b>Self-rated physical demand</b>        |                          |         |                         |         |
| Demanding                                | 1                        |         | -                       | -       |
| Very demanding                           | 1.75 (1.10-2.75)         | 0.018   | 1.60(1.00-2.56)         | 0.050   |
| <b>Fear-avoidance beliefs</b>            |                          |         |                         |         |
| FABQ-W $\leq$ 20 <sup>+</sup>            | 1                        |         | -                       | -       |
| FABQ-W>20 <sup>+</sup>                   | 2.75 (1.61-4.84)         | <0.001  | 2.67 (1.55-4.73)        | 0.001   |
| <b>Physical demanding workloads</b>      |                          |         |                         |         |
| Standing/walking > 5.44 hours/day        | 0.85 (0.5-1.34)          | 0.485   | 0.84 (0.53-1.33)        | 0.462   |
| Lifting >650 kg/day                      | 1.41 (0.90-2.23)         | 0.134   | 1.38 (0.87-2.18)        | 0.174   |
| Number of heavy lifts > 7.7<br>times/day | 1.60 (1.02-2.53)         | 0.041   | 1.57 (0.99-2.50)        | 0.056   |

\* Adjusted for sex and age, + Fear-Avoidance Beliefs Questionnaire-in relation to Work

14

1  
2  
3  
4 1 There was a positive association of lifting loads over 20 kg more than 7.7 times per day measured  
5  
6 2 by JEM, which was borderline statistically significant after adjustment. None of the other physical  
7  
8 3 workloads were significantly associated with sick leave due to LBP. There was very low exposure  
9  
10 4 to kneeling and whole-body vibration and thus these exposures were not included in the analyses.  
11  
12  
13

## 14 5 **Interactions**

16  
17 6 Physically demanding workloads did not modify the association between self-reported physical  
18  
19 7 demand and sick leave due to LBP (table 3).  
20  
21  
22

23 Table 3: Modifying effects of specific independent exposures on the association  
24 between self-reported physical demand and sick leave due to LBP.

|                                       | Interaction OR* (95%CI) | P-value |
|---------------------------------------|-------------------------|---------|
| <b>Fear avoidance beliefs</b>         |                         |         |
| FABQ-W>20 <sup>+</sup>                | 1.27 (0.39-4.32)        | 0.70    |
| <b>Physically demanding workloads</b> |                         |         |
| Standing/walking > 5.44 hours/day     | 0.74 (0.29-1.86)        | 0.52    |
| Standing/walking > 6 hours/day        | 1.21 (0.37-4.02)        | 0.76    |
| Lifting >650 kg/day                   | 0.63 (0.24-1.59)        | 0.32    |
| Lifting >1000 kg/day                  | 0.99 (0.37-2.64)        | 0.97    |
| Number of heavy lifts > 7.7 times/day | 0.75 (0.29-1.90)        | 0.4     |
| Number of heavy lifts > 15 times/day  | 1.09 (0.28-4.39)        | 0.90    |

25  
26  
27  
28  
29  
30  
31  
32  
33  
34  
35 \* Adjusted for sex and age, + Fear-Avoidance Beliefs Questionnaire-in relation to Work

36 8 We repeated the analysis with other exposure levels (standing/walking > 6 hours/day, lifting a total  
37  
38 9 of >1000 kg/day and lifting over 20kgs > 15 times/day) but this did not change the results.  
39  
40

41 10 Similar results of no modification effect of JEM variables were found between FABQ-W>20 and  
42  
43 11 sick leave due to LBP, table 4.  
44  
45  
46  
47 12  
48  
49  
50 13  
51  
52  
53 14  
54  
55  
56 15  
57  
58  
59  
60

Sick leave due to low back pain.

Table 4: Modifying effects of specific independent exposures on the association between fear-avoidance beliefs and sick leave due to LBP.

|                                       | Interaction OR* (95%CI) | P-value |
|---------------------------------------|-------------------------|---------|
| <b>Physically demanding workloads</b> |                         |         |
| Standing/walking > 5.44 hours/day     | 0.77 (0.25-2.40)        | 0.65    |
| Standing/walking > 6 hours/day        | 1.16 (0.30-5.29)        | 0.83    |
| Lifting >650 kg/day                   | 0.88 (0.29-2.69)        | 0.83    |
| Lifting >1000 kg/day                  | 1.11 (0.34-3.82)        | 0.87    |
| Number of heavy lifts > 7.7 times/day | 1.04 (0.34-3.16)        | 0.95    |
| Number of heavy lifts > 15 times/day  | 1.38 (0.30-6.70)        | 0.68    |

\* Adjusted for sex and age,

There was a relatively poor correlation between self-reported physical demand and high fear-avoidance beliefs (FABQ-W>20) ( $r= 0.29$ ,  $P<0.0001$ ). No correlation was found between self-reported physical demand and total kg lifted ( $r= -0.05$ ,  $P=0.345$ ), standing/walking time ( $r= 0.07$ ,  $P=0.254$ ) or lifting loads over 20kg ( $r= -0.05$ ,  $P=0.349$ ).

## DISCUSSION

### Key results

In this study, self-reported high physical demand at work and high FAB were associated with reported sick leave due to LBP in the previous year. Standing/walking time and total number of kg lifted in one day had no association with reported sick leave due to LBP, whereas lifting over 20 kg several times a day may be associated. To some surprise, independent expert exposure assessments of workload did not modify the found association between self-reported high physical demand at work/ high FAB and sick leave.

Our results confirmed the hypothesis that reported sick leave due to LBP in the previous year was associated with self-reported very physically demanding work and high FAB and to a lesser degree with “objective” intensity of specific types of physical workloads. The poor correlation between JEM variables and self-reported physical demand supports this conclusion.

### Limitations



Sick leave due to low back pain.

1  
2  
3  
4  
5  
6  
7  
8  
9  
10  
11  
12  
13  
14  
15  
16  
17  
18  
19  
20  
21  
22  
23  
24  
25  
26  
27  
28  
29  
30  
31  
32  
33  
34  
35  
36  
37  
38  
39  
40  
41  
42  
43  
44  
45  
46  
47  
48  
49  
50  
51  
52  
53  
54  
55  
56  
57  
58  
59  
60

1 The study is based on cross-sectional baseline data from a randomized controlled trial with the aim  
2 of retaining participants with physically demanding work and LBP in their job. This limits our  
3 ability to investigate causality. The trial included only participants with self-reported physically  
4 demanding or very demanding work and concern about their ability to maintain their current job.  
5 The resulting FAB score and self-reported physical demands may consequently have been inflated  
6 and can result in a lack of contrast among the participants and therefore between the groups. An  
7 association was found, and the estimate is probably conservative. Furthermore, use of JEMs entails  
8 risk of misclassification of exposure,[23] as people with the same job title may have different  
9 exposure to physical workloads and using expert assessment of exposures at the occupational level  
10 may therefore miss potentially large individual differences and peak exposures. This can also lead  
11 to conservative estimates of associations. Another limitation is the dichotomizing of the JEM based  
12 physical workload exposures and of the FABQ-W. No gold standard exists regarding cut-off values  
13 for either. Several different methods have been proposed and used, and none have been  
14 validated.[8] We used FABQ-W score at 20 or less for low FAB as proposed by others[8,21] and  
15 medians for JEM based physical workload exposures. This may also increase the risk of  
16 misclassification and therefore underestimate differences between groups. Self-reported sick leave  
17 is sensitive to recall bias. However, a meta-analysis has found reasonable rank order convergence  
18 with record-based data[24], for which reason we trust in the outcome data. This study includes a  
19 selected group of participants with physically demanding work. We did not adjust for  
20 socioeconomic status due to risk for over-adjusting since workers with lower socioeconomic status  
21 tend to have more physically demanding work.[25] Sample size might explain the wide confidence  
22 intervals on all modifications by JEM, but since all odds-ratios are close to 1, it is hardly a question  
23 of lack of strength in the data. Neither was there a problem with data contrast in exposure variables  
24 of the JEM.

Sick leave due to low back pain.

1  
2  
3  
4 1 Self-reported workload exposures are often used as exposure variable, although it may have a  
5  
6 2 validity problem, as individuals with musculoskeletal complaints tend to overestimate their  
7  
8 3 exposures.[14] In this study, we have overcome this problem by using a job exposure matrix in  
9  
10 4 combination with perceived self-reported physical demand.  
11  
12  
13

## 14 5 **Interpretation**

16  
17 6 The low correlation between self-reported physical demand and JEM variables and no modifying  
18  
19 7 effect of JEM variables indicates that self-reported physical demand might be a more independent  
20  
21 8 risk factor than expected. This may be an expression of the participants assessment of their own  
22  
23 9 physical work capacity with LBP or another work-related factor that we have not investigated. Due  
24  
25 10 to the exclusion of participants with low self-reported physical demand we were unable to explore  
26  
27 11 this further.  
28  
29  
30  
31

32 12 The Lower Body JEM has recently been used on a large general working population and found an  
33  
34 13 exposure-response relation between ton- lifting- and kneeling years and all-cause long term sick  
35  
36 14 leave.[26] The contrast with our results may be due to different definitions of exposure (medians vs  
37  
38 15 ton-/lifting-years), older but healthier population and long term versus relatively short-term sick  
39  
40 16 leave.  
41  
42  
43

44 17 Participants with different durations of LBP have different prognostic outcomes. It has been shown  
45  
46 18 that FAB is associated with poor prognosis in LBP of any duration, but stronger with subacute  
47  
48 19 LBP.[8,27] Our results confirm the association between high FAB and sick leave although many of  
49  
50 20 our participants, in addition to a subacute period of LBP, also had a longer history of LBP.  
51  
52  
53

54 21 Self-reported physical workloads and sick leave have been found to be associated.[11–13] Recently,  
55  
56 22 5076 workers in Denmark have been investigated and self-assessed life-long hard physical work  
57  
58 23 and in particular lifting/carrying tasks were found to be associated with all-cause long-term sick  
59  
60

1  
2  
3  
4  
5  
6  
7  
8  
9  
10  
11  
12  
13  
14  
15  
16  
17  
18  
19  
20  
21  
22  
23  
24  
25  
26  
27  
28  
29  
30  
31  
32  
33  
34  
35  
36  
37  
38  
39  
40  
41  
42  
43  
44  
45  
46  
47  
48  
49  
50  
51  
52  
53  
54  
55  
56  
57  
58  
59  
60

1 leave.[28] Similar results was found in shipyard workers, where a borderline significant association  
2 between sick leave due to LBP and self-reported physical work factors was found.[29] Our results  
3 are in line with these findings, although we used other exposure definitions. In contrast, a  
4 longitudinal study with 6 months follow-up among 407 industrial workers used high perceived  
5 physical workload as exposure variable, but found no association with sick leave due to LPB.[30]  
6 This result can however be explained by low number of workers reporting sick leave or having  
7 LBP.

8 In a large review regarding acute LBP and sick leave, Steenstra et al found strong evidence for  
9 heavy work, in various definitions, as a predictor for duration of sick leave.[31] A later review by  
10 the same author regarding patients with subacute and chronic LBP, a population more similar to  
11 ours, concluded insufficient to moderate evidence for an association with physical demands at  
12 work.[25]

13 Lifting, trunk flexion and rotation increased the risk of sick leave due to LBP in a longitudinal study  
14 with video-documented physical exposures.[32] In our study, we did not use objective  
15 measurements but instead a JEM, which may explain the difference between the results because of  
16 the risk of misclassification of exposure by using a JEM. This illustrates the importance of further  
17 large studies with objective measures of physical workload and prospective designs.

## 18 CONCLUSION

19 Our study suggests that self-reported high physical demand at work and high fear-avoidance are  
20 associated with reported sick leave due to LBP in the previous year in individuals with physically  
21 demanding jobs. We found no association between reported sick leave due to LBP in the previous  
22 year and high physical workloads, except for number of heavy lifts measured by JEM. Interestingly,  
23 the high physical workloads did not modify the associations with sick leave in participants who rate

Sick leave due to low back pain.

1  
2  
3  
4 1 their work as very demanding or with high fear-avoidance scores. The poor correlation between  
5  
6 2 JEM variables and self-reported physical demand indicates, that occupational interventions to  
7  
8  
9 3 reduce sick leave due to LBP may have to focus more on those with high self-reported physical  
10  
11 4 demands and high fear-avoidance, and less on individuals with the objectively highest physical  
12  
13 5 workload.  
14  
15

## 16 6 **Footnotes**

17  
18  
19  
20 7 **Funding:** This work was supported by the Danish Working Environment Research Fund (grant  
21 8 number 09-2012-09).  
22  
23 9

24  
25 10 **Contributorship statement:** JAP, LK, BBH, LMB, EMF, AIK: Study concept and design. JAP,  
26  
27 11 BBH, LMB, AIK: Data acquisition. JAP, BBH, EMF: Statistical analysis. JAP, LK, BBH, LMB,  
28  
29 12 EMF, MB, PH, HB, AIK: Analysis and interpretation of data and critical revision and approval of  
30  
31 13 the final manuscript. JAP: Drafting of the manuscript. All authors reviewed drafts and approved the  
32  
33 14 final manuscript.  
34  
35  
36

37  
38 15 **Data sharing statement:** Research records and data collection are obtained according to the Danish  
39  
40 16 Personal Data Act (DPA) guidelines and any extra data is available upon request under the terms of  
41  
42 17 DPA and European GDPR. The authors affirm that this manuscript is an honest, accurate, and  
43  
44 18 transparent account of the study being reported; that no important aspects of the study have been  
45  
46 19 omitted; and that any discrepancies from the study as planned have been explained. Full dataset to  
47  
48 20 replicate the main analysis is available from the corresponding author on reasonable request  
49  
50  
51

52 21 **Competing interests:** there are no competing interests for any author.  
53  
54

55 22 Figure legend: Figure 1: Flow chart for the actual study in the GoBack trial.  
56  
57  
58  
59  
60

1  
2  
3  
4  
5  
6  
7  
8  
9  
10  
11  
12  
13  
14  
15  
16  
17  
18  
19  
20  
21  
22  
23  
24  
25  
26  
27  
28  
29  
30  
31  
32  
33  
34  
35  
36  
37  
38  
39  
40  
41  
42  
43  
44  
45  
46  
47  
48  
49  
50  
51  
52  
53  
54  
55  
56  
57  
58  
59  
60

1 Licence Statement: I, the Submitting Author has the right to grant and does grant on behalf of all  
2 authors of the Work (as defined in the below author licence), an exclusive licence and/or a non-  
3 exclusive licence for contributions from authors who are: i) UK Crown employees; ii) where BMJ  
4 has agreed a CC-BY licence shall apply, and/or iii) in accordance with the terms applicable for US  
5 Federal Government officers or employees acting as part of their official duties; on a worldwide,  
6 perpetual, irrevocable, royalty-free basis to BMJ Publishing Group Ltd (“BMJ”) its licensees and  
7 where the relevant Journal is co-owned by BMJ to the co-owners of the Journal, to publish the  
8 Work in BMJ Open and any other BMJ products and to exploit all rights, as set out in our licence.

9

10

11

12 1

Hoy D, Brooks P, Blyth F, *et al.* The Epidemiology of low back pain. *Best Pract Res Clin Rheumatol*  
2010;**24**:769–81. doi:10.1016/j.berh.2010.10.002

14 2

Murray CJL, Barber RM, Foreman KJ, *et al.* Global, regional, and national disability-adjusted life years  
(DALYs) for 306 diseases and injuries and healthy life expectancy (HALE) for 188 countries, 1990-  
2013: Quantifying the epidemiological transition. *Lancet* 2015;**386**:2145–91. doi:10.1016/S0140-  
6736(15)61340-X

18 3

Flachs EM, Eriksen L, Koch MB., *et al.* Sygdomsbyrden i Danmark – sygdomme. Copenhagen: 2015.

19 4

Balagué F, Mannion AF, Pellisé F, *et al.* Non-specific low back pain. *Lancet* 2012;**379**:482–91.  
doi:10.1016/S0140-6736(11)60610-7

21 5

Demoulin C, Marty M, Genevay S, *et al.* Effectiveness of preventive back educational interventions  
for low back pain: A critical review of randomized controlled clinical trials. *Eur Spine J* 2012;**21**:2520–

Sick leave due to low back pain.

- 1  
2  
3  
4 1 30. doi:10.1007/s00586-012-2445-2  
5  
6  
7 2 6 Maher CG. A systematic review of workplace interventions to prevent low back pain. *J Osteopath*  
8  
9  
10 3 3 *Med* 2001;**4**:32. doi:10.1016/S1443-8461(01)80046-0  
11  
12  
13 4 7 Hilfiker R, Bachmann LM, Heitz CAM, *et al*. Value of predictive instruments to determine persisting  
14  
15 5 restriction of function in patients with subacute non-specific low back pain. Systematic review. *Eur*  
16  
17 6 *Spine J* 2007;**16**:1755–75. doi:10.1007/s00586-007-0433-8  
18  
19  
20 7 8 Wertli MM, Rasmussen-Barr E, Weiser S, *et al*. The role of fear avoidance beliefs as a prognostic  
21  
22 8 factor for outcome in patients with nonspecific low back pain: A systematic review. *Spine J*  
23  
24 9 2014;**14**:816–36. doi:10.1016/j.spinee.2013.09.036  
25  
26  
27  
28 10 9 Jensen JN, Karpatschof B, Labriola M, *et al*. Do fear-avoidance beliefs play a role on the association  
29  
30 11 between low back pain and sickness absence? A prospective cohort study among female health care  
31  
32 12 workers. *J Occup Environ Med* 2010;**52**:85–90. doi:10.1097/JOM.0b013e3181c95b9e  
33  
34  
35 13 10 Fritz JM, George SZ, Delitto A. The role of fear-avoidance beliefs in acute low back pain:  
36  
37 14 Relationships with current and future disability and work status. *Pain* 2001;**94**:7–15.  
38  
39 15 doi:10.1016/S0304-3959(01)00333-5  
40  
41  
42  
43 16 11 Andersen LL, Fallentin N, Thorsen SV, *et al*. Physical workload and risk of long-term sickness absence  
44  
45 17 in the general working population and among blue-collar workers: prospective cohort study with  
46  
47 18 register follow-up. *Occup Environ Med* 2016;**73**:246–53. doi:10.1136/oemed-2015-103314  
48  
49  
50 19 12 Lund T, Labriola M, Christensen KB, *et al*. Physical work environment risk factors for long term  
51  
52 20 sickness absence: prospective findings among a cohort of 5357 employees in Denmark. *Bmj*  
53  
54 21 2006;**332**:449–52. doi:10.1136/bmj.38731.622975.3A  
55  
56  
57  
58 22 13 Sundstrup E, Andersen LL. Hard Physical Work Intensifies the Occupational Consequence of  
59  
60

1  
2  
3  
4  
5  
6  
7  
8  
9  
10  
11  
12  
13  
14  
15  
16  
17  
18  
19  
20  
21  
22  
23  
24  
25  
26  
27  
28  
29  
30  
31  
32  
33  
34  
35  
36  
37  
38  
39  
40  
41  
42  
43  
44  
45  
46  
47  
48  
49  
50  
51  
52  
53  
54  
55  
56  
57  
58  
59  
60

- 1 Physician-Diagnosed Back Disorder: Prospective Cohort Study with Register Follow-Up among  
2  
3  
4 1 10,000 Workers. *Int J Rheumatol* 2017;**2017**:1037051. doi:10.1155/2017/1037051  
5  
6 2  
7  
8  
9 3 14 Balogh I, Ørbæk P, Ohlsson K, *et al.* Self-assessed and directly measured occupational physical  
10 4 activities - Influence of musculoskeletal complaints, age and gender. *Appl Ergon* 2004;**35**:49–56.  
11 5 doi:10.1016/j.apergo.2003.06.001  
12  
13  
14 6 15 Hawkes AP, Wilkins JR. Assessing agreement between two job-exposure matrices. *Scand J Work*  
15 7 *Environ Health* 1997;**23**:140–8. <http://www.ncbi.nlm.nih.gov/pubmed/9167237>  
16  
17 8 16 Rubak TS, Svendsen SW, Andersen JH, *et al.* An expert-based job exposure matrix for large scale  
18 9 epidemiologic studies of primary hip and knee osteoarthritis: The Lower Body JEM. *BMC*  
19 10 *Musculoskelet Disord* 2014;**15**:204. doi:10.1186/1471-2474-15-204  
20  
21  
22 11 17 Hansen BB, Kirkeskov L, Christensen R, *et al.* Retention in physically demanding jobs of individuals  
23 12 with low back pain: study protocol for a randomised controlled trial. *Trials* 2015;**16**:166.  
24 13 doi:10.1186/s13063-015-0684-3  
25  
26  
27 14 18 Elm E Von, Altman DG, Egger M, *et al.* guidelines for reporting observational studies Strengthening  
28 15 the reporting of observational studies in epidemiology ( STROBE ) statement : guidelines for  
29 16 reporting observational studies. *Br Med J* 2007;**335**:19–22. doi:10.1136/bmj.39335.541782.AD  
30  
31  
32 17 19 Gudbergsen H, Bartels EM, Krusager P, *et al.* Test-retest of computerized health status  
33 18 questionnaires frequently used in the monitoring of knee osteoarthritis: a randomized crossover  
34 19 trial. *BMC Musculoskelet Disord* 2011;**12**:190. doi:10.1186/1471-2474-12-190  
35  
36  
37 20 20 Waddell G, Newton M, Henderson I, *et al.* A Fear-Avoidance Beliefs Questionnaire (FABQ) and the  
38 21 role of fear-avoidance beliefs in chronic low back pain and disability. *Pain* 1993;**52**:157–68.  
39 22 doi:10.1016/0304-3959(93)90127-B  
40  
41  
42  
43  
44  
45  
46  
47  
48  
49  
50  
51  
52  
53  
54  
55  
56  
57  
58  
59  
60

Sick leave due to low back pain.

- 1  
2  
3  
4 1 21 George SZ, Fritz JM, Childs JD. Investigation of elevated fear-avoidance beliefs for patients with low  
5  
6 2 back pain: a secondary analysis involving patients enrolled in physical therapy clinical trials. *J Orthop*  
7  
8 3 *Sports Phys Ther* 2008;**38**:50–8. doi:10.2519/jospt.2008.2647  
9  
10  
11 4 22 Statistics Denmark. Danish ISCO-88 classification.  
12  
13 5 1996.<http://www.dst.dk/da/statistik/dokumentation/Nomenklaturer/DISCO-88.aspx>  
14  
15  
16  
17 6 23 Kauppinen T, Uuksulainen S, Saalo A, *et al.* Use of the finnish information system on occupational  
18  
19 7 exposure (FINJEM) in epidemiologic, surveillance, and other applications. *Ann Occup Hyg*  
20  
21 8 2014;**58**:380–96. doi:10.1093/annhyg/met074  
22  
23  
24 9 24 Johns G, Miraglia M. The reliability, validity, and accuracy of self-reported absenteeism from work: a  
25  
26 10 meta-analysis. *J Occup Health Psychol* 2015;**20**:1–14. doi:10.1037/a0037754  
27  
28  
29  
30 11 25 Steenstra IA, Munhall C, Irvin E, *et al.* Systematic Review of Prognostic Factors for Return to Work in  
31  
32 12 Workers with Sub Acute and Chronic Low Back Pain. *J Occup Rehabil* Published Online First: 19  
33  
34 13 September 2016. doi:10.1007/s10926-016-9666-x  
35  
36  
37 14 26 Sundstrup E, Hansen ÅM, Mortensen EL, *et al.* Cumulative occupational mechanical exposures  
38  
39 15 during working life and risk of sickness absence and disability pension: Prospective cohort study.  
40  
41 16 *Scand J Work Environ Heal* 2017;**43**:415–25. doi:10.5271/sjweh.3663  
42  
43  
44  
45 17 27 Wertli MM, Rasmussen-Barr E, Held U, *et al.* Fear-avoidance beliefs—a moderator of treatment  
46  
47 18 efficacy in patients with low back pain: a systematic review. *Spine J* 2014;**14**:2658–78.  
48  
49 19 doi:10.1016/j.spinee.2014.02.033  
50  
51  
52 20 28 Sundstrup E, Hansen ÅM, Mortensen EL, *et al.* Retrospectively assessed physical work environment  
53  
54 21 during working life and risk of sickness absence and labour market exit among older workers. *Occup*  
55  
56 22 *Environ Med* 2017;:oemed-2016-104279. doi:10.1136/oemed-2016-104279  
57  
58  
59  
60



- 1  
2  
3  
4 1 29 Alexopoulos EC, Konstantinou EC, Bakoyannis G, *et al.* Risk factors for sickness absence due to low  
5  
6 2 back pain and prognostic factors for return to work in a cohort of shipyard workers. *Eur Spine J*  
7  
8 3 2008;**17**:1185–92. doi:10.1007/s00586-008-0711-0  
9  
10  
11 4 30 IJzelenberg W, Burdorf a. Risk factors for musculoskeletal symptoms and ensuing health care use  
12  
13 and sick leave. *Spine (Phila Pa 1976)* 2005;**30**:1550–6. doi:10.1097/01.brs.0000167533.83154.28  
14 5  
15  
16 6 31 Steenstra IA, Verbeek JH, Heymans MW, *et al.* Prognostic factors for duration of sick leave in  
17  
18 7 patients sick listed with acute low back pain: a systematic review of the literature. *Occup Environ*  
19  
20 8 *Med* 2005;**62**:851–60. doi:10.1136/oem.2004.015842  
21  
22  
23 9 32 Hoogendoorn WE, Bongers PM, de Vet HCW, *et al.* High physical work load and low job satisfaction  
24  
25 10 increase the risk of sickness absence due to low back pain: results of a prospective cohort study.  
26  
27 11 *Occup Environ Med* 2002;**59**:323–8. <http://www.ncbi.nlm.nih.gov/pubmed/11983847>  
28  
29  
30  
31  
32  
33  
34  
35  
36  
37  
38  
39  
40  
41  
42  
43  
44  
45  
46  
47  
48  
49  
50  
51  
52  
53  
54  
55  
56  
57  
58  
59  
60

1  
2  
3  
4  
5  
6  
7  
8  
9  
10  
11  
12  
13  
14  
15  
16  
17  
18  
19  
20  
21  
22  
23  
24  
25  
26  
27  
28  
29  
30  
31  
32  
33  
34  
35  
36  
37  
38  
39  
40  
41  
42  
43  
44  
45  
46  
47  
48  
49  
50  
51  
52  
53  
54  
55  
56  
57  
58  
59  
60



338x190mm (300 x 300 DPI)

STROBE Statement—Checklist of items that should be included in reports of *cross-sectional studies*

|                              | Item No | Recommendation                                                                                                                                                                                               | Page No  |
|------------------------------|---------|--------------------------------------------------------------------------------------------------------------------------------------------------------------------------------------------------------------|----------|
| <b>Title and abstract</b>    | 1       | (a) Indicate the study's design with a commonly used term in the title or the abstract                                                                                                                       | 1        |
|                              |         | (b) Provide in the abstract an informative and balanced summary of what was done and what was found                                                                                                          | 2        |
| <b>Introduction</b>          |         |                                                                                                                                                                                                              |          |
| Background/rationale         | 2       | Explain the scientific background and rationale for the investigation being reported                                                                                                                         | 4        |
| Objectives                   | 3       | State specific objectives, including any prespecified hypotheses                                                                                                                                             | 5        |
| <b>Methods</b>               |         |                                                                                                                                                                                                              |          |
| Study design                 | 4       | Present key elements of study design early in the paper                                                                                                                                                      | 5        |
| Setting                      | 5       | Describe the setting, locations, and relevant dates, including periods of recruitment, exposure, follow-up, and data collection                                                                              | 5-6      |
| Participants                 | 6       | (a) Give the eligibility criteria, and the sources and methods of selection of participants                                                                                                                  | 5-6      |
| Variables                    | 7       | Clearly define all outcomes, exposures, predictors, potential confounders, and effect modifiers. Give diagnostic criteria, if applicable                                                                     | 6-7      |
| Data sources/<br>measurement | 8*      | For each variable of interest, give sources of data and details of methods of assessment (measurement). Describe comparability of assessment methods if there is more than one group                         | 6-7      |
| Bias                         | 9       | Describe any efforts to address potential sources of bias                                                                                                                                                    | 7-8      |
| Study size                   | 10      | Explain how the study size was arrived at                                                                                                                                                                    | 8        |
| Quantitative variables       | 11      | Explain how quantitative variables were handled in the analyses. If applicable, describe which groupings were chosen and why                                                                                 | 7-8      |
| Statistical methods          | 12      | (a) Describe all statistical methods, including those used to control for confounding                                                                                                                        | 7-8      |
|                              |         | (b) Describe any methods used to examine subgroups and interactions                                                                                                                                          | 7-8      |
|                              |         | (c) Explain how missing data were addressed                                                                                                                                                                  | 7-8      |
|                              |         | (d) If applicable, describe analytical methods taking account of sampling strategy                                                                                                                           | 7-8      |
|                              |         | (e) Describe any sensitivity analyses                                                                                                                                                                        |          |
| <b>Results</b>               |         |                                                                                                                                                                                                              |          |
| Participants                 | 13*     | (a) Report numbers of individuals at each stage of study—eg numbers potentially eligible, examined for eligibility, confirmed eligible, included in the study, completing follow-up, and analysed            | 8        |
|                              |         | (b) Give reasons for non-participation at each stage                                                                                                                                                         | 8        |
|                              |         | (c) Consider use of a flow diagram                                                                                                                                                                           | Figure 1 |
| Descriptive data             | 14*     | (a) Give characteristics of study participants (eg demographic, clinical, social) and information on exposures and potential confounders                                                                     | 9        |
|                              |         | (b) Indicate number of participants with missing data for each variable of interest                                                                                                                          | 9        |
| Outcome data                 | 15*     | Report numbers of outcome events or summary measures                                                                                                                                                         | 9        |
| Main results                 | 16      | (a) Give unadjusted estimates and, if applicable, confounder-adjusted estimates and their precision (eg, 95% confidence interval). Make clear which confounders were adjusted for and why they were included | 9        |

|                          |    |                                                                                                                                                                            |        |
|--------------------------|----|----------------------------------------------------------------------------------------------------------------------------------------------------------------------------|--------|
|                          |    | (b) Report category boundaries when continuous variables were categorized                                                                                                  | tables |
|                          |    | (c) If relevant, consider translating estimates of relative risk into absolute risk for a meaningful time period                                                           |        |
| Other analyses           | 17 | Report other analyses done—eg analyses of subgroups and interactions, and sensitivity analyses                                                                             | 11     |
| <b>Discussion</b>        |    |                                                                                                                                                                            |        |
| Key results              | 18 | Summarise key results with reference to study objectives                                                                                                                   | 12     |
| Limitations              | 19 | Discuss limitations of the study, taking into account sources of potential bias or imprecision. Discuss both direction and magnitude of any potential bias                 | 13     |
| Interpretation           | 20 | Give a cautious overall interpretation of results considering objectives, limitations, multiplicity of analyses, results from similar studies, and other relevant evidence | 14     |
| Generalisability         | 21 | Discuss the generalisability (external validity) of the study results                                                                                                      | 14     |
| <b>Other information</b> |    |                                                                                                                                                                            |        |
| Funding                  | 22 | Give the source of funding and the role of the funders for the present study and, if applicable, for the original study on which the present article is based              | 16     |

\*Give information separately for exposed and unexposed groups.

**Note:** An Explanation and Elaboration article discusses each checklist item and gives methodological background and published examples of transparent reporting. The STROBE checklist is best used in conjunction with this article (freely available on the Web sites of PLoS Medicine at <http://www.plosmedicine.org/>, Annals of Internal Medicine at <http://www.annals.org/>, and Epidemiology at <http://www.epidem.com/>). Information on the STROBE Initiative is available at [www.strobe-statement.org](http://www.strobe-statement.org).
